# Supplementary material for: A comprehensive analysis of age-related metabolomics and transcriptomics reveals metabolic alterations in rat bone marrow mesenchymal stem cells
Source: publisher site journal article supplement (doi:10.18632/aging.203857), 2022-01-30
Supplement: Supplementary file [file aging-v14i2-203857-supplementary-material-SD1.pdf]

# SUPPLEMENTARY FIGURE

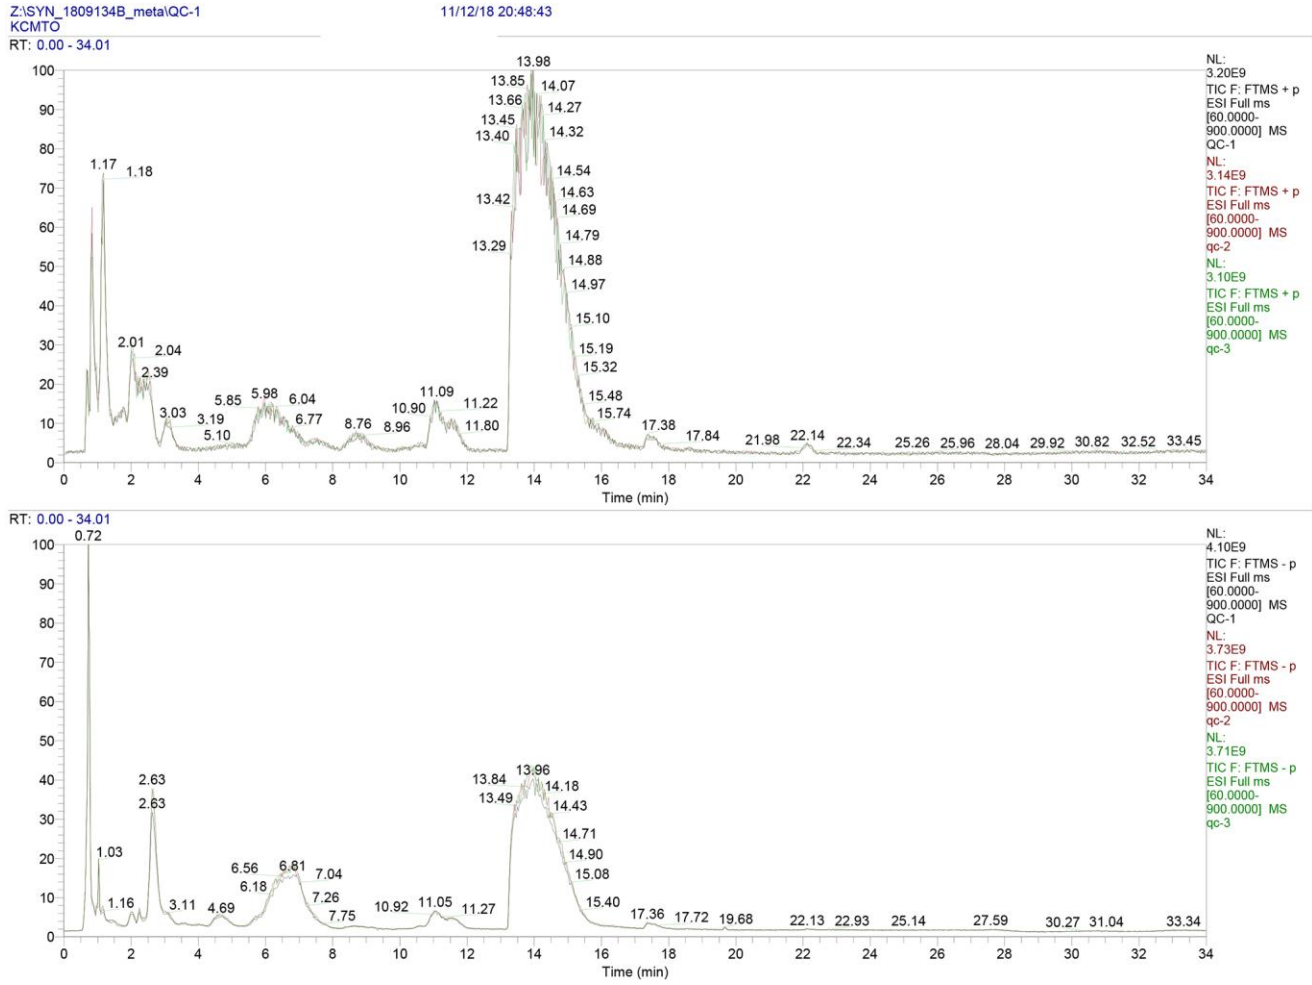

Supplementary Figure 1. TIC for sequentially selected QC samples.

## Supplementary Tables

Please browse Full Text version to see the data of Supplementary Tables 1–4.

**Supplementary Table 1. GO enrichment results of up-regulated DEGs.**

**Supplementary Table 2. GO enrichment results of down-regulated DEGs.**

**Supplementary Table 3. KEGG enrichment results of up-regulated DEGs.**

**Supplementary Table 4. KEGG enrichment results of down-regulated DEGs.**

**Supplementary Table 5. The generic HPLC gradient.**

| Time     | A   | B   |
|----------|-----|-----|
| 0.0 min  | 10% | 90% |
| 1.0 min  | 10% | 90% |
| 11.0 min | 13% | 87% |
| 14.0 min | 20% | 80% |
| 16.5 min | 30% | 70% |
| 18.5 min | 50% | 50% |
| 20.5 min | 80% | 20% |
| 25.0 min | 80% | 20% |
| 25.1 min | 10% | 90% |
| 34.0 min | 10% | 90% |

**Supplementary Table 6. Primers used for quantitative real-time PCR.**

| Gene                 | Forward primers               | Reverse primers              |
|----------------------|-------------------------------|------------------------------|
| $\beta$ -Actin       | 5'-GGAGATTACTGCCCTGGCTCCTA    | 5'-GACTCATCGTACTCCTGCTTGCTG  |
| P16 <sup>INK4A</sup> | 5'-AACACTTTCGGTCGTACCC        | 5'-GTCCTCGCAGTTCGAATC        |
| Scd                  | 5'-CTCAGCGCTGGGAAAGTG         | 5'-GAACTGGAGATCTCTTGGAGCA    |
| Scd2                 | 5'-GCAGATGTTCGCCCTGAAATTA     | 5'-CAAATATGCAAAGAGGCAGGTGTAG |
| Dgat2                | 5'-CTTCCTGGTGCTAGGAGTGG       | 5'-GCCAGCCAGGTGAAGTAGAG      |
| Fads2                | 5'-TTGCACAAGATTGCCCA          | 5'-GGCTTCTCTTGGTATTCAATGCC   |
| Lpin1                | 5'-TATGACACGGCTTGTTCC         | 5'-GTGGCTGCCCTGTATTTCC       |
| Gpat3                | 5'-TGGACTGATGGGGATCATTACAGAGA | 5'-GCCCAGCTTGTCATTATCCGAA    |
| Acaa2                | 5'-GCCGCCACACTATTAAGGCT       | 5'-CGCTTCGCAGCAACGATAAA      |
| Lpcat3               | 5'-TTTCTGGTTCCGCTGCATGT       | 5'-CCGACAGAATGCACACTCCTTC    |
| Pcyt2                | 5'-AGGCTGGGAGGTACAGAGAG       | 5'-AGGACATCTCCTGGCTGCTA      |
| Pla2g4a              | 5'-5TGTTCAACAGAGTTTTGG        | 5'-AACAGAGCAACGAGATGG        |
