# Supplementary material for: A comprehensive analysis of age-related metabolomics and transcriptomics reveals metabolic alterations in rat bone marrow mesenchymal stem cells
Source: publisher site journal article supplement (doi:10.18632/aging.203857), 2022-01-30
Supplement: Supplementary file [file aging-v14i2-203857-supplementary-material-SD6.pdf]

## SUPPLEMENTARY TABLES

**Supplementary Table 5. The generic HPLC gradient.**

| <b>Time</b> | <b>A</b> | <b>B</b> |
|-------------|----------|----------|
| 0.0 min     | 10%      | 90%      |
| 1.0 min     | 10%      | 90%      |
| 11.0 min    | 13%      | 87%      |
| 14.0 min    | 20%      | 80%      |
| 16.5 min    | 30%      | 70%      |
| 18.5 min    | 50%      | 50%      |
| 20.5 min    | 80%      | 20%      |
| 25.0 min    | 80%      | 20%      |
| 25.1 min    | 10%      | 90%      |
| 34.0 min    | 10%      | 90%      |

**Supplementary Table 6. Primers used for quantitative real-time PCR.**

| <b>Gene</b>          | <b>Forward primers</b>        | <b>Reverse primers</b>       |
|----------------------|-------------------------------|------------------------------|
| $\beta$ -Actin       | 5'-GGAGATTACTGCCCTGGCTCCTA    | 5'-GACTCATCGTACTCCTGCTTGCTG  |
| P16 <sup>INK4A</sup> | 5'-AACACTTTCGGTCGTACCC        | 5'-GTCCTCGCAGTTCGAATC        |
| Scd                  | 5'-CTCAGCGCTGGGAAAGTG         | 5'-GAACTGGAGATCTCTTGGAGCA    |
| Scd2                 | 5'-GCAGATGTTCCGCCCTGAAATTA    | 5'-CAAATATGCAAAGAGGCAGGTGTAG |
| Dgat2                | 5'-CTTCCTGGTGCTAGGAGTGG       | 5'-GCCAGCCAGGTGAAGTAGAG      |
| Fads2                | 5'-TTGCACAAGATTGCCCCA         | 5'-GGCTTCTCTTGGTATTCAATGCC   |
| Lpin1                | 5'-TATGACACGGCTTGTTCC         | 5'-GTGGCTGCCCTGTATTTCC       |
| Gpat3                | 5'-TGGACTGATGGGGATCATTACAGAGA | 5'-GCCCAGCTTGTCATTATCCGAA    |
| Acaa2                | 5'-GCCGCCACACTATTAAGGCT       | 5'-CGCTTCGCAGCAACGATAAA      |
| Lpcat3               | 5'-TTTCTGGTTCCGCTGCATGT       | 5'-CCGACAGAATGCACACTCCTTC    |
| Pcyt2                | 5'-AGGCTGGGAGGTACAGAGAG       | 5'-AGGACATCTCCTGGCTGCTA      |
| Pla2g4a              | 5'-5TGTTCAACAGAGTTTTGG        | 5'-AACAGAGCAACGAGATGG        |
