# Supplementary material for: A comprehensive analysis of age-related metabolomics and transcriptomics reveals metabolic alterations in rat bone marrow mesenchymal stem cells
Source: Aging (Albany NY). 2022 Jan 30;14(2):1014–32. doi: 10.18632/aging.203857 (PMC8833123; doi:10.18632/aging.203857)
Supplement: Supplementary Table 1 [file aging-14-203857-s002.xlsx]

## Sheet: Supplementary Table 1
Supplementary Table 1. GO enrichment results of up-regulated DEGs.
	ONTOLOGY	ID	Description	GeneRatio	BgRatio	pvalue	p.adjust	qvalue	geneID	Count
GO:0031589	BP	GO:0031589	cell-substrate adhesion	29/216	347/17962	1.86e-16	6.21e-13	4.68e-13	Serpine1/Itga6/Abi3bp/Ccdc80/Phldb2/Nid1/Itgbl1/Fbln2/Jag1/Itgb1/Ccn1/Cdh13/Nedd9/Ccn2/Sorbs1/Lims2/Kank1/Itga8/Adamts12/Msln/Actn4/Gcnt2/Acvrl1/Hacd1/Thbs1/Itga1/Lama5/Flna/Actn1	29
GO:0042060	BP	GO:0042060	wound healing	28/216	445/17962	7.81e-13	1.11e-09	8.35e-10	Pdgfa/Serpine1/Phldb2/Tgfb2/Myh10/Notch3/Sdc2/Jag1/Mcam/Ets1/Tgfb3/Slc7a11/Ccn1/Kank1/Mustn1/Tpm1/Msx2/Hbegf/Cdh3/Cadm4/Acvrl1/Thbs1/Foxc2/F2r/Flna/Acta2/Tnc/Anxa8	28
GO:0030198	BP	GO:0030198	extracellular matrix organization	22/216	269/17962	1.54e-12	1.11e-09	8.35e-10	Eln/Abi3bp/Ccdc80/Phldb2/Tgfb2/Nid1/Dpt/Olfml2b/Fbln2/Tnfrsf11b/Ets1/Itgb1/Ccn1/Ccn2/Col4a1/Itga8/Col4a2/Acan/Col15a1/Foxc2/Fbln5/Myh11	22
GO:0001525	BP	GO:0001525	angiogenesis	29/216	494/17962	1.66e-12	1.11e-09	8.35e-10	Pdgfa/Serpine1/Tgfb2/Prkd1/Notch3/Rock2/Meox2/Mcam/Ets1/Itgb1/Plk2/Ccn1/Edn1/Cdh13/Efnb2/Ccn2/Bmper/Col4a1/Cspg4/Mfge8/Ackr3/Col4a2/Acvrl1/Thbs1/Foxc2/Myh9/Flna/LOC100909849/Fzd8	29
GO:0043062	BP	GO:0043062	extracellular structure organization	22/216	270/17962	1.66e-12	1.11e-09	8.35e-10	Eln/Abi3bp/Ccdc80/Phldb2/Tgfb2/Nid1/Dpt/Olfml2b/Fbln2/Tnfrsf11b/Ets1/Itgb1/Ccn1/Ccn2/Col4a1/Itga8/Col4a2/Acan/Col15a1/Foxc2/Fbln5/Myh11	22
GO:0010810	BP	GO:0010810	regulation of cell-substrate adhesion	20/216	220/17962	2.38e-12	1.33e-09	9.99e-10	Serpine1/Itga6/Abi3bp/Ccdc80/Phldb2/Nid1/Fbln2/Jag1/Itgb1/Ccn1/Cdh13/Nedd9/Lims2/Kank1/Actn4/Gcnt2/Acvrl1/Hacd1/Thbs1/Flna	20
GO:0071559	BP	GO:0071559	response to transforming growth factor beta	20/216	253/17962	3.11e-11	1.48e-08	1.12e-08	Pdgfa/Serpine1/Eln/Rasl11b/Tgfb2/Rock2/Tgfb3/Itgb1/Edn1/Lrrc32/Itga8/Ldlrad4/Gcnt2/Col4a2/Acvrl1/Cilp/Hspa1a/Thbs1/Hspa1b/Cav2	20
GO:0071560	BP	GO:0071560	cellular response to transforming growth factor beta stimulus	19/216	246/17962	1.47e-10	6.15e-08	4.63e-08	Pdgfa/Serpine1/Eln/Rasl11b/Tgfb2/Rock2/Tgfb3/Edn1/Lrrc32/Itga8/Ldlrad4/Gcnt2/Col4a2/Acvrl1/Cilp/Hspa1a/Thbs1/Hspa1b/Cav2	19
GO:0045785	BP	GO:0045785	positive regulation of cell adhesion	24/216	424/17962	3.33e-10	1.23e-07	9.29e-08	Itga6/Abi3bp/Hes1/Ccdc80/Tgfb2/Nid1/Fbln2/Ets1/Itgb1/Ptafr/Ccn1/Cdh13/Nedd9/Efnb2/Il1rl2/Lims2/Tpm1/Gcnt2/Tnfsf18/Adam19/Hacd1/Thbs1/Foxc2/Flna	24
GO:0090092	BP	GO:0090092	regulation of transmembrane receptor protein serine/threonine kinase signaling pathway	18/216	234/17962	4.89e-10	1.63e-07	1.23e-07	Hes1/Rasl11b/Tgfb2/Grem2/Tgfb3/Bmp6/Inhba/Ccn1/Bmper/Itga8/Ldlrad4/Msx2/Acvrl1/Cilp/Hspa1a/Thbs1/Hspa1b/Cav2	18
GO:0007160	BP	GO:0007160	cell-matrix adhesion	17/216	209/17962	6.4e-10	1.94e-07	1.46e-07	Serpine1/Itga6/Phldb2/Nid1/Itgbl1/Jag1/Itgb1/Cdh13/Ccn2/Sorbs1/Itga8/Adamts12/Msln/Acvrl1/Thbs1/Itga1/Actn1	17
GO:0001667	BP	GO:0001667	ameboidal-type cell migration	23/216	418/17962	1.38e-09	3.82e-07	2.88e-07	Serpine1/Tgfb2/Prkd1/Rock2/Arhgdib/Meox2/Ets1/Schip1/Itgb1/Plk2/Tns1/Cdh13/Efnb2/Bmper/Kank1/Hbegf/Akap12/Acvrl1/Thbs1/Foxc2/Myh9/Lama5/Acta2	23
GO:0051017	BP	GO:0051017	actin filament bundle assembly	15/216	167/17962	1.71e-09	4.4e-07	3.31e-07	Eln/Phldb2/Myh10/Rock2/Arhgef5/Tgfb3/Aif1l/Cald1/Ccn2/Sorbs1/Tpm1/Dpysl3/Actn4/Flna/Actn1	15
GO:0061572	BP	GO:0061572	actin filament bundle organization	15/216	170/17962	2.19e-09	5.23e-07	3.94e-07	Eln/Phldb2/Myh10/Rock2/Arhgef5/Tgfb3/Aif1l/Cald1/Ccn2/Sorbs1/Tpm1/Dpysl3/Actn4/Flna/Actn1	15
GO:0090130	BP	GO:0090130	tissue migration	19/216	297/17962	3.5e-09	7.78e-07	5.86e-07	Serpine1/Tgfb2/Prkd1/Rock2/Meox2/Ets1/Itgb1/Plk2/Cdh13/Efnb2/Bmper/Kank1/Hbegf/Acvrl1/Actg2/Thbs1/Foxc2/Myh9/Acta2	19
GO:0090287	BP	GO:0090287	regulation of cellular response to growth factor stimulus	18/216	272/17962	5.41e-09	1.13e-06	8.5e-07	Hes1/Rasl11b/Grem2/Tgfb3/Ccn1/Bmper/Tmem204/Itga8/Ldlrad4/Msx2/Adamts12/Cadm4/Spry1/Acvrl1/Hspa1a/Thbs1/Hspa1b/Cav2	18
GO:0010811	BP	GO:0010811	positive regulation of cell-substrate adhesion	13/216	135/17962	9.23e-09	1.81e-06	1.36e-06	Itga6/Abi3bp/Ccdc80/Nid1/Fbln2/Itgb1/Ccn1/Cdh13/Nedd9/Lims2/Hacd1/Thbs1/Flna	13
GO:0007178	BP	GO:0007178	transmembrane receptor protein serine/threonine kinase signaling pathway	20/216	354/17962	1.11e-08	2.06e-06	1.55e-06	Hes1/Rasl11b/Tgfb2/Grem2/Tgfb3/Bmp6/Inhba/Ccn1/Lrrc32/Bmper/Itga8/Ldlrad4/Msx2/Gcnt2/Acvrl1/Cilp/Hspa1a/Thbs1/Hspa1b/Cav2	20
GO:0060537	BP	GO:0060537	muscle tissue development	23/216	474/17962	1.48e-08	2.6e-06	1.96e-06	Atg5/Eln/Tgfb2/Myh10/Akap6/Meox2/Itga7/Schip1/Itgb1/Edn1/Efnb2/Pgm5/Pdlim5/Itga8/Fhl2/Tpm1/Syne1/Ncam1/Foxc2/Bdnf/Actn1/Cav2/Myh11	23
GO:0007015	BP	GO:0007015	actin filament organization	21/216	403/17962	1.92e-08	3.21e-06	2.42e-06	Eln/Phldb2/Myh10/Rock2/Arhgef5/Tgfb3/Aif1l/Cald1/Nedd9/Ccn2/Sorbs1/Kank1/Mical2/Tpm1/Dpysl3/Actn4/Plekhg2/Fat1/Lmod1/Flna/Actn1	21
GO:0035051	BP	GO:0035051	cardiocyte differentiation	14/216	182/17962	4.41e-08	7e-06	5.27e-06	Atg5/Hes1/Tgfb2/Myh10/Akap6/Jag1/Itgb1/Edn1/Efnb2/Pdlim5/Fhl2/Syne1/Spry1/Myh11	14
GO:0060485	BP	GO:0060485	mesenchyme development	17/216	279/17962	4.92e-08	7.17e-06	5.4e-06	Hes1/Phldb2/Tgfb2/Jag1/Tgfb3/Edn1/Ldlrad4/Msx2/Gcnt2/Spry1/Acvrl1/Actg2/Thbs1/Foxc2/Lama5/Flna/Acta2	17
GO:0007229	BP	GO:0007229	integrin-mediated signaling pathway	11/216	104/17962	4.94e-08	7.17e-06	5.4e-06	Itga6/Itgb1bp2/Itgbl1/Itga7/Itgb1/Ccn2/Lims2/Itga8/Itga1/Lama5/Flna	11
GO:0010631	BP	GO:0010631	epithelial cell migration	17/216	288/17962	7.8e-08	1.08e-05	8.17e-06	Serpine1/Tgfb2/Prkd1/Rock2/Meox2/Ets1/Itgb1/Plk2/Cdh13/Efnb2/Bmper/Kank1/Hbegf/Acvrl1/Thbs1/Foxc2/Myh9	17
GO:0090132	BP	GO:0090132	epithelium migration	17/216	290/17962	8.62e-08	1.15e-05	8.66e-06	Serpine1/Tgfb2/Prkd1/Rock2/Meox2/Ets1/Itgb1/Plk2/Cdh13/Efnb2/Bmper/Kank1/Hbegf/Acvrl1/Thbs1/Foxc2/Myh9	17
GO:0001655	BP	GO:0001655	urogenital system development	20/216	405/17962	1.03e-07	1.32e-05	9.92e-06	Pdgfa/Itga6/Hes1/Tgfb2/Nid1/Notch3/Jag1/Schip1/Bmp6/Efnb2/Bmper/Col4a1/Itga8/Spry1/Crip1/Foxc2/Bdnf/Lama5/Acta2/Tnc	20
GO:0042692	BP	GO:0042692	muscle cell differentiation	20/216	406/17962	1.07e-07	1.32e-05	9.94e-06	Atg5/Hes1/Myh10/Akap6/Itgb1/Edn1/Efnb2/Pgm5/Pdlim5/Tmem204/Itga8/Fhl2/Tpm1/Syne1/Sort1/Hacd1/Bdnf/Actn1/Cav2/Myh11	20
GO:0051271	BP	GO:0051271	negative regulation of cellular component movement	18/216	332/17962	1.15e-07	1.37e-05	1.04e-05	Adarb1/Serpine1/Phldb2/Dusp1/Arhgdib/Meox2/Jag1/Scp2/Kank1/Ldlrad4/Tpm1/Dpysl3/Actn4/Acvrl1/Acan/Thbs1/Actn1/Igfbp3	18
GO:0014706	BP	GO:0014706	striated muscle tissue development	21/216	451/17962	1.3e-07	1.5e-05	1.13e-05	Atg5/Eln/Tgfb2/Myh10/Akap6/Meox2/Itga7/Itgb1/Edn1/Efnb2/Pgm5/Pdlim5/Fhl2/Tpm1/Syne1/Ncam1/Foxc2/Bdnf/Actn1/Cav2/Myh11	21
GO:0031032	BP	GO:0031032	actomyosin structure organization	14/216	202/17962	1.62e-07	1.8e-05	1.36e-05	Eln/Phldb2/Myh10/Rock2/Arhgef5/Tgfb3/Itgb1/Edn1/Ccn2/Pgm5/Sorbs1/Tpm1/Cnn1/Actn1	14
GO:0090288	BP	GO:0090288	negative regulation of cellular response to growth factor stimulus	12/216	145/17962	1.87e-07	2.01e-05	1.52e-05	Rasl11b/Grem2/Tgfb3/Bmper/Ldlrad4/Adamts12/Cadm4/Spry1/Hspa1a/Thbs1/Hspa1b/Cav2	12
GO:0030336	BP	GO:0030336	negative regulation of cell migration	16/216	281/17962	3.1e-07	3.15e-05	2.37e-05	Adarb1/Serpine1/Phldb2/Dusp1/Arhgdib/Meox2/Jag1/Scp2/Kank1/Ldlrad4/Tpm1/Dpysl3/Acvrl1/Acan/Thbs1/Igfbp3	16
GO:0072001	BP	GO:0072001	renal system development	18/216	355/17962	3.12e-07	3.15e-05	2.37e-05	Pdgfa/Itga6/Hes1/Tgfb2/Nid1/Notch3/Jag1/Schip1/Bmp6/Efnb2/Bmper/Col4a1/Itga8/Spry1/Foxc2/Bdnf/Lama5/Acta2	18
GO:0051146	BP	GO:0051146	striated muscle cell differentiation	17/216	329/17962	5.16e-07	5.07e-05	3.82e-05	Atg5/Myh10/Akap6/Itgb1/Edn1/Efnb2/Pgm5/Pdlim5/Fhl2/Tpm1/Syne1/Sort1/Hacd1/Bdnf/Actn1/Cav2/Myh11	17
GO:2000146	BP	GO:2000146	negative regulation of cell motility	16/216	297/17962	6.51e-07	6.07e-05	4.57e-05	Adarb1/Serpine1/Phldb2/Dusp1/Arhgdib/Meox2/Jag1/Scp2/Kank1/Ldlrad4/Tpm1/Dpysl3/Acvrl1/Acan/Thbs1/Igfbp3	16
GO:0010812	BP	GO:0010812	negative regulation of cell-substrate adhesion	8/216	61/17962	6.54e-07	6.07e-05	4.57e-05	Serpine1/Phldb2/Jag1/Kank1/Actn4/Gcnt2/Acvrl1/Thbs1	8
GO:0045216	BP	GO:0045216	cell-cell junction organization	12/216	168/17962	9.18e-07	8.07e-05	6.08e-05	Tgfb2/Rock2/Tgfb3/Vcl/Itgb1/Cdh13/Lims2/Cdh3/Actn4/Plekha7/F2r/Flna	12
GO:0090100	BP	GO:0090100	positive regulation of transmembrane receptor protein serine/threonine kinase signaling pathway	10/216	111/17962	9.19e-07	8.07e-05	6.08e-05	Hes1/Tgfb2/Tgfb3/Bmp6/Inhba/Ccn1/Itga8/Msx2/Acvrl1/Thbs1	10
GO:0007179	BP	GO:0007179	transforming growth factor beta receptor signaling pathway	12/216	169/17962	9.78e-07	8.37e-05	6.3e-05	Rasl11b/Tgfb2/Tgfb3/Lrrc32/Itga8/Ldlrad4/Gcnt2/Acvrl1/Hspa1a/Thbs1/Hspa1b/Cav2	12
GO:0043542	BP	GO:0043542	endothelial cell migration	13/216	204/17962	1.17e-06	9.79e-05	7.37e-05	Prkd1/Rock2/Meox2/Ets1/Itgb1/Plk2/Cdh13/Efnb2/Bmper/Acvrl1/Thbs1/Foxc2/Myh9	13
GO:0003007	BP	GO:0003007	heart morphogenesis	15/216	276/17962	1.32e-06	0.000107205	8.08e-05	Eln/Hes1/Tgfb2/Jag1/Ccn1/Mical2/Fhl2/Tpm1/Msx2/Spry1/Acvrl1/Cpe/Thbs1/Foxc2/Flna	15
GO:0042476	BP	GO:0042476	odontogenesis	11/216	145/17962	1.46e-06	0.000115843	8.73e-05	Serpine1/Itga6/Tnfrsf11b/Inhba/Edn1/Msx2/Lhx8/Pam/Hacd1/Lama5/Tnc	11
GO:0043534	BP	GO:0043534	blood vessel endothelial cell migration	10/216	117/17962	1.49e-06	0.000115949	8.73e-05	Prkd1/Meox2/Ets1/Itgb1/Plk2/Efnb2/Acvrl1/Thbs1/Foxc2/Myh9	10
GO:0033002	BP	GO:0033002	muscle cell proliferation	14/216	245/17962	1.66e-06	0.000126132	9.5e-05	Tgfb2/Notch3/Tgfb3/Ptafr/Edn1/Cdh13/Tpm1/Hbegf/Npr3/Cnn1/Ncam1/Thbs1/Foxc2/Igfbp3	14
GO:0055001	BP	GO:0055001	muscle cell development	13/216	211/17962	1.71e-06	0.000127007	9.57e-05	Atg5/Hes1/Myh10/Akap6/Itgb1/Edn1/Pgm5/Pdlim5/Fhl2/Tpm1/Actn1/Cav2/Myh11	13
GO:0048762	BP	GO:0048762	mesenchymal cell differentiation	13/216	218/17962	2.46e-06	0.000178603	0.000134537	Hes1/Phldb2/Tgfb2/Jag1/Tgfb3/Edn1/Ldlrad4/Msx2/Gcnt2/Spry1/Foxc2/Lama5/Flna	13
GO:0008015	BP	GO:0008015	blood circulation	20/216	497/17962	2.55e-06	0.000180753	0.000136157	Atg5/Tgfb2/Rock2/Akap6/Gucy1a1/Ptafr/Edn1/Kcnd3/Ccn2/Mrvi1/Tpm1/Hbegf/Npr3/Akap12/Acvrl1/Hspa1a/Foxc2/F2r/Itga1/Acta2	20
GO:0048738	BP	GO:0048738	cardiac muscle tissue development	14/216	255/17962	2.66e-06	0.000184934	0.000139306	Atg5/Tgfb2/Myh10/Akap6/Itgb1/Edn1/Efnb2/Pdlim5/Fhl2/Tpm1/Syne1/Ncam1/Foxc2/Myh11	14
GO:0044319	BP	GO:0044319	wound healing	spreading of cells	6/216	34/17962	2.86e-06	0.000189864	0.00014302	Phldb2/Ccn1/Msx2/Hbegf/Acvrl1/Flna	6
GO:0090505	BP	GO:0090505	epiboly involved in wound healing	6/216	34/17962	2.86e-06	0.000189864	0.00014302	Phldb2/Ccn1/Msx2/Hbegf/Acvrl1/Flna	6
GO:0040013	BP	GO:0040013	negative regulation of locomotion	16/216	333/17962	2.9e-06	0.000189864	0.00014302	Adarb1/Serpine1/Phldb2/Dusp1/Arhgdib/Meox2/Jag1/Scp2/Kank1/Ldlrad4/Tpm1/Dpysl3/Acvrl1/Acan/Thbs1/Igfbp3	16
GO:0001822	BP	GO:0001822	kidney development	16/216	334/17962	3.02e-06	0.000193525	0.000145778	Pdgfa/Hes1/Tgfb2/Nid1/Notch3/Jag1/Schip1/Bmp6/Efnb2/Bmper/Itga8/Spry1/Foxc2/Bdnf/Lama5/Acta2	16
GO:0001974	BP	GO:0001974	blood vessel remodeling	7/216	53/17962	3.18e-06	0.000200255	0.000150848	Atg5/Eln/Tgfb2/Jag1/Acvrl1/Foxc2/Flna	7
GO:0090504	BP	GO:0090504	epiboly	6/216	35/17962	3.42e-06	0.000211479	0.000159303	Phldb2/Ccn1/Msx2/Hbegf/Acvrl1/Flna	6
GO:0055002	BP	GO:0055002	striated muscle cell development	12/216	198/17962	5.12e-06	0.00031057	0.000233945	Atg5/Myh10/Akap6/Itgb1/Edn1/Pgm5/Pdlim5/Fhl2/Tpm1/Actn1/Cav2/Myh11	12
GO:0032970	BP	GO:0032970	regulation of actin filament-based process	17/216	395/17962	6.17e-06	0.000367896	0.000277128	Eln/Phldb2/Tgfb2/Rock2/Akap6/Arhgef5/Arhgdib/Tgfb3/Edn1/Ccn2/Kank1/Tpm1/Plekhg2/Pam/Lmod1/Flna/Acta2	17
GO:0043405	BP	GO:0043405	regulation of MAP kinase activity	15/216	315/17962	6.65e-06	0.000377408	0.000284292	Pdgfa/C1qtnf2/Dusp1/Arhgef5/Tgfb3/Gadd45g/Edn1/Cspg4/Spry1/Dusp8/Thbs1/F2r/Itga1/LOC100909849/Fzd8	15
GO:0055006	BP	GO:0055006	cardiac cell development	9/216	109/17962	6.71e-06	0.000377408	0.000284292	Atg5/Myh10/Akap6/Jag1/Edn1/Pdlim5/Fhl2/Spry1/Myh11	9
GO:0060840	BP	GO:0060840	artery development	9/216	109/17962	6.71e-06	0.000377408	0.000284292	Eln/Hes1/Tgfb2/Myh10/Notch3/Jag1/Efnb2/Acvrl1/Foxc2	9
GO:1902903	BP	GO:1902903	regulation of supramolecular fiber organization	16/216	356/17962	6.79e-06	0.000377408	0.000284292	Eln/Phldb2/Rock2/Arhgef5/Tgfb3/Cryab/Edn1/Ccn2/Kank1/Tpm1/Plekhg2/LOC108348108/Hspa1a/Hspa1b/Lmod1/Flna	16
GO:0002011	BP	GO:0002011	morphogenesis of an epithelial sheet	7/216	60/17962	7.42e-06	0.000405967	0.000305805	Phldb2/Jag1/Ccn1/Msx2/Hbegf/Acvrl1/Flna	7
GO:0061041	BP	GO:0061041	regulation of wound healing	10/216	140/17962	7.56e-06	0.00040689	0.000306501	Pdgfa/Serpine1/Phldb2/Kank1/Hbegf/Cadm4/Thbs1/Foxc2/F2r/Acta2	10
GO:0048771	BP	GO:0048771	tissue remodeling	12/216	207/17962	8.06e-06	0.000421647	0.000317617	Atg5/Eln/Tgfb2/Rock2/Jag1/Tnfrsf11b/Tgfb3/Cspg4/Acvrl1/Foxc2/F2r/Flna	12
GO:0048660	BP	GO:0048660	regulation of smooth muscle cell proliferation	11/216	173/17962	8.09e-06	0.000421647	0.000317617	Notch3/Tgfb3/Ptafr/Edn1/Cdh13/Tpm1/Hbegf/Npr3/Cnn1/Thbs1/Igfbp3	11
GO:0051961	BP	GO:0051961	negative regulation of nervous system development	16/216	366/17962	9.6e-06	0.00048775	0.000367411	Hes1/Notch3/Jag1/Itgb1/Prag1/Fat3/Plk2/Efnb2/Kank1/Cspg4/Dpysl3/Ntm/Cpe/Bdnf/Daam2/Flna	16
GO:0090101	BP	GO:0090101	negative regulation of transmembrane receptor protein serine/threonine kinase signaling pathway	9/216	114/17962	9.68e-06	0.00048775	0.000367411	Rasl11b/Grem2/Tgfb3/Bmper/Ldlrad4/Cilp/Hspa1a/Hspa1b/Cav2	9
GO:0036293	BP	GO:0036293	response to decreased oxygen levels	18/216	453/17962	9.79e-06	0.00048775	0.000367411	Pdgfa/Serpine1/Eln/Tgfb2/Rock2/Sdc2/Ets1/Tgfb3/Cryab/Edn1/Ccn2/Pdlim1/Cpeb1/Actn4/Acvrl1/Pam/Bdnf/Igfbp3	18
GO:0003018	BP	GO:0003018	vascular process in circulatory system	12/216	212/17962	1.03e-05	0.0004987	0.000375659	Atg5/Rock2/Gucy1a1/Ptafr/Edn1/Mrvi1/Akap12/Hspa1a/Foxc2/F2r/Itga1/Acta2	12
GO:0060393	BP	GO:0060393	regulation of pathway-restricted SMAD protein phosphorylation	7/216	63/17962	1.03e-05	0.0004987	0.000375659	Tgfb2/Tgfb3/Bmp6/Inhba/Bmper/Ldlrad4/Acvrl1	7
GO:0048659	BP	GO:0048659	smooth muscle cell proliferation	11/216	179/17962	1.12e-05	0.000532668	0.000401247	Notch3/Tgfb3/Ptafr/Edn1/Cdh13/Tpm1/Hbegf/Npr3/Cnn1/Thbs1/Igfbp3	11
GO:0055007	BP	GO:0055007	cardiac muscle cell differentiation	10/216	148/17962	1.23e-05	0.00056723	0.000427281	Atg5/Myh10/Akap6/Itgb1/Edn1/Efnb2/Pdlim5/Fhl2/Syne1/Myh11	10
GO:0035296	BP	GO:0035296	regulation of tube diameter	11/216	181/17962	1.24e-05	0.00056723	0.000427281	Atg5/Rock2/Gucy1a1/Ptafr/Edn1/Mrvi1/Hspa1a/Foxc2/F2r/Itga1/Acta2	11
GO:0097746	BP	GO:0097746	regulation of blood vessel diameter	11/216	181/17962	1.24e-05	0.00056723	0.000427281	Atg5/Rock2/Gucy1a1/Ptafr/Edn1/Mrvi1/Hspa1a/Foxc2/F2r/Itga1/Acta2	11
GO:0035150	BP	GO:0035150	regulation of tube size	11/216	182/17962	1.31e-05	0.000589361	0.000443952	Atg5/Rock2/Gucy1a1/Ptafr/Edn1/Mrvi1/Hspa1a/Foxc2/F2r/Itga1/Acta2	11
GO:0035904	BP	GO:0035904	aorta development	7/216	66/17962	1.41e-05	0.000611275	0.000460459	Eln/Hes1/Tgfb2/Myh10/Jag1/Efnb2/Acvrl1	7
GO:0060389	BP	GO:0060389	pathway-restricted SMAD protein phosphorylation	7/216	66/17962	1.41e-05	0.000611275	0.000460459	Tgfb2/Tgfb3/Bmp6/Inhba/Bmper/Ldlrad4/Acvrl1	7
GO:0061448	BP	GO:0061448	connective tissue development	14/216	295/17962	1.41e-05	0.000611275	0.000460459	Tgfb2/Mgp/Bmp6/Ccn1/Edn1/Ccn2/Mustn1/Msx2/Adamts12/Crip1/Acan/Thbs1/Foxc2/Acta2	14
GO:0060562	BP	GO:0060562	epithelial tube morphogenesis	16/216	379/17962	1.48e-05	0.000633111	0.000476908	Hes1/Tgfb2/Rock2/Mgp/Pgr/Edn1/Efnb2/Mical2/Col4a1/Msx2/Adamts12/Spry1/Acvrl1/Foxc2/Lama5/Tnc	16
GO:1901342	BP	GO:1901342	regulation of vasculature development	15/216	338/17962	1.54e-05	0.000647494	0.000487742	Serpine1/Tgfb2/Prkd1/Rock2/Meox2/Ets1/Itgb1/Plk2/Ccn1/Efnb2/Bmper/Col4a2/Acvrl1/Thbs1/Foxc2	15
GO:0001666	BP	GO:0001666	response to hypoxia	17/216	424/17962	1.55e-05	0.000647494	0.000487742	Pdgfa/Serpine1/Eln/Tgfb2/Rock2/Sdc2/Ets1/Tgfb3/Cryab/Edn1/Pdlim1/Cpeb1/Actn4/Acvrl1/Pam/Bdnf/Igfbp3	17
GO:0050768	BP	GO:0050768	negative regulation of neurogenesis	15/216	341/17962	1.71e-05	0.000702464	0.00052915	Hes1/Notch3/Jag1/Itgb1/Prag1/Fat3/Plk2/Efnb2/Kank1/Cspg4/Dpysl3/Ntm/Bdnf/Daam2/Flna	15
GO:0032956	BP	GO:0032956	regulation of actin cytoskeleton organization	15/216	345/17962	1.95e-05	0.000795287	0.000599071	Eln/Phldb2/Tgfb2/Rock2/Arhgef5/Arhgdib/Tgfb3/Edn1/Ccn2/Kank1/Tpm1/Plekhg2/Pam/Lmod1/Flna	15
GO:0045665	BP	GO:0045665	negative regulation of neuron differentiation	13/216	265/17962	2.03e-05	0.000812614	0.000612123	Hes1/Notch3/Jag1/Itgb1/Prag1/Fat3/Plk2/Efnb2/Kank1/Cspg4/Dpysl3/Ntm/Flna	13
GO:0045765	BP	GO:0045765	regulation of angiogenesis	14/216	305/17962	2.05e-05	0.000812614	0.000612123	Serpine1/Tgfb2/Prkd1/Rock2/Meox2/Ets1/Itgb1/Plk2/Ccn1/Bmper/Col4a2/Acvrl1/Thbs1/Foxc2	14
GO:0010632	BP	GO:0010632	regulation of epithelial cell migration	12/216	229/17962	2.22e-05	0.000871235	0.000656281	Serpine1/Tgfb2/Prkd1/Rock2/Meox2/Ets1/Plk2/Bmper/Hbegf/Acvrl1/Thbs1/Foxc2	12
GO:0010721	BP	GO:0010721	negative regulation of cell development	16/216	396/17962	2.53e-05	0.00098181	0.000739574	Hes1/Notch3/Jag1/Itgb1/Prag1/Fat3/Plk2/Efnb2/Kank1/Cspg4/Dpysl3/Actn4/Ntm/Bdnf/Daam2/Flna	16
GO:0043406	BP	GO:0043406	positive regulation of MAP kinase activity	12/216	233/17962	2.63e-05	0.0010099	0.000760731	Pdgfa/C1qtnf2/Arhgef5/Tgfb3/Gadd45g/Edn1/Cspg4/Thbs1/F2r/Itga1/LOC100909849/Fzd8	12
GO:0030038	BP	GO:0030038	contractile actin filament bundle assembly	8/216	101/17962	2.98e-05	0.00111595	0.000840622	Eln/Phldb2/Rock2/Arhgef5/Tgfb3/Ccn2/Sorbs1/Tpm1	8
GO:0043149	BP	GO:0043149	stress fiber assembly	8/216	101/17962	2.98e-05	0.00111595	0.000840622	Eln/Phldb2/Rock2/Arhgef5/Tgfb3/Ccn2/Sorbs1/Tpm1	8
GO:0048844	BP	GO:0048844	artery morphogenesis	7/216	76/17962	3.57e-05	0.00132118	0.000995217	Hes1/Tgfb2/Notch3/Jag1/Efnb2/Acvrl1/Foxc2	7
GO:1904018	BP	GO:1904018	positive regulation of vasculature development	11/216	203/17962	3.6e-05	0.00132118	0.000995217	Serpine1/Prkd1/Ets1/Itgb1/Plk2/Ccn1/Efnb2/Bmper/Acvrl1/Thbs1/Foxc2	11
GO:1902905	BP	GO:1902905	positive regulation of supramolecular fiber organization	11/216	206/17962	4.12e-05	0.00149437	0.00112567	Rock2/Arhgef5/Tgfb3/Edn1/Ccn2/Tpm1/LOC108348108/Hspa1a/Hspa1b/Lmod1/Flna	11
GO:0001837	BP	GO:0001837	epithelial to mesenchymal transition	9/216	137/17962	4.22e-05	0.00149787	0.00112831	Phldb2/Tgfb2/Jag1/Tgfb3/Ldlrad4/Msx2/Gcnt2/Spry1/Flna	9
GO:0017015	BP	GO:0017015	regulation of transforming growth factor beta receptor signaling pathway	8/216	106/17962	4.22e-05	0.00149787	0.00112831	Rasl11b/Tgfb3/Itga8/Ldlrad4/Hspa1a/Thbs1/Hspa1b/Cav2	8
GO:0034616	BP	GO:0034616	response to laminar fluid shear stress	4/216	17/17962	4.28e-05	0.00150317	0.0011323	Serpine1/Tgfb2/Ets1/Tgfb3	4
GO:0007162	BP	GO:0007162	negative regulation of cell adhesion	13/216	285/17962	4.32e-05	0.00150317	0.0011323	Serpine1/Phldb2/Dusp1/Jag1/Cdh13/Lrrc32/Kank1/Actn4/Gcnt2/Tnfsf18/Acvrl1/Thbs1/Tnc	13
GO:0072132	BP	GO:0072132	mesenchyme morphogenesis	6/216	54/17962	4.5e-05	0.00154886	0.00116672	Tgfb2/Msx2/Acvrl1/Actg2/Foxc2/Acta2	6
GO:2000027	BP	GO:2000027	regulation of animal organ morphogenesis	11/216	209/17962	4.7e-05	0.00158633	0.00119495	Pdgfa/Hes1/Tgfb2/Jag1/Tnfrsf11b/Dact1/Edn1/Lims2/Spry1/Foxc2/Bdnf	11
GO:0007517	BP	GO:0007517	muscle organ development	16/216	417/17962	4.71e-05	0.00158633	0.00119495	Adarb1/Eln/Tgfb2/Akap6/Meox2/Itga7/Cryab/Edn1/Efnb2/Tpm1/Ncam1/Foxc2/Bdnf/Lama5/Actn1/Cav2	16
GO:1903844	BP	GO:1903844	regulation of cellular response to transforming growth factor beta stimulus	8/216	108/17962	4.83e-05	0.00161015	0.00121289	Rasl11b/Tgfb3/Itga8/Ldlrad4/Hspa1a/Thbs1/Hspa1b/Cav2	8
GO:0002042	BP	GO:0002042	cell migration involved in sprouting angiogenesis	6/216	55/17962	5e-05	0.00165307	0.00124522	Meox2/Itgb1/Plk2/Efnb2/Thbs1/Foxc2	6
GO:0035909	BP	GO:0035909	aorta morphogenesis	5/216	35/17962	5.81e-05	0.00187424	0.00141182	Hes1/Tgfb2/Jag1/Efnb2/Acvrl1	5
GO:0051216	BP	GO:0051216	cartilage development	11/216	214/17962	5.82e-05	0.00187424	0.00141182	Tgfb2/Mgp/Bmp6/Ccn1/Edn1/Ccn2/Mustn1/Msx2/Adamts12/Acan/Thbs1	11
GO:0003151	BP	GO:0003151	outflow tract morphogenesis	7/216	82/17962	5.84e-05	0.00187424	0.00141182	Eln/Hes1/Tgfb2/Jag1/Msx2/Thbs1/Foxc2	7
GO:0003206	BP	GO:0003206	cardiac chamber morphogenesis	9/216	143/17962	5.9e-05	0.00187424	0.00141182	Hes1/Tgfb2/Jag1/Ccn1/Fhl2/Tpm1/Msx2/Cpe/Foxc2	9
GO:0031345	BP	GO:0031345	negative regulation of cell projection organization	11/216	215/17962	6.07e-05	0.00191165	0.00144	Hes1/Itgb1/Prag1/Fat3/Plk2/Efnb2/Kank1/Cspg4/Dpysl3/Ntm/Flna	11
GO:0010634	BP	GO:0010634	positive regulation of epithelial cell migration	9/216	144/17962	6.23e-05	0.00194165	0.0014626	Serpine1/Tgfb2/Prkd1/Rock2/Ets1/Plk2/Hbegf/Thbs1/Foxc2	9
GO:0010977	BP	GO:0010977	negative regulation of neuron projection development	10/216	180/17962	6.63e-05	0.00202949	0.00152877	Hes1/Prag1/Fat3/Plk2/Efnb2/Kank1/Cspg4/Dpysl3/Ntm/Flna	10
GO:1903034	BP	GO:1903034	regulation of response to wounding	10/216	180/17962	6.63e-05	0.00202949	0.00152877	Pdgfa/Serpine1/Phldb2/Kank1/Hbegf/Cadm4/Thbs1/Foxc2/F2r/Acta2	10
GO:0090303	BP	GO:0090303	positive regulation of wound healing	6/216	58/17962	6.78e-05	0.00203832	0.00153542	Serpine1/Kank1/Hbegf/Thbs1/Foxc2/F2r	6
GO:0035313	BP	GO:0035313	wound healing	spreading of epidermal cells	4/216	19/17962	6.84e-05	0.00203832	0.00153542	Phldb2/Msx2/Hbegf/Acvrl1	4
GO:0060055	BP	GO:0060055	angiogenesis involved in wound healing	4/216	19/17962	6.84e-05	0.00203832	0.00153542	Serpine1/Mcam/Ets1/Foxc2	4
GO:0034329	BP	GO:0034329	cell junction assembly	15/216	388/17962	7.48e-05	0.00221021	0.0016649	Phldb2/Gpc4/Rock2/Vcl/Itgb1/Tns1/Cdh13/Efnb2/Sorbs1/Pdlim5/Cdh3/Actn4/Acvrl1/Bdnf/Actn1	15
GO:0045860	BP	GO:0045860	positive regulation of protein kinase activity	17/216	482/17962	7.73e-05	0.00226401	0.00170543	Pdgfa/Tgfb2/C1qtnf2/Akap6/Arhgef5/Tgfb3/Gadd45g/Ccn1/Edn1/Nedd9/Afap1l2/Cspg4/Thbs1/F2r/Itga1/LOC100909849/Fzd8	17
GO:0045766	BP	GO:0045766	positive regulation of angiogenesis	10/216	184/17962	7.97e-05	0.00228808	0.00172355	Serpine1/Prkd1/Ets1/Itgb1/Plk2/Ccn1/Bmper/Acvrl1/Thbs1/Foxc2	10
GO:0002040	BP	GO:0002040	sprouting angiogenesis	8/216	116/17962	8.02e-05	0.00228808	0.00172355	Meox2/Itgb1/Plk2/Cdh13/Efnb2/Bmper/Thbs1/Foxc2	8
GO:0006939	BP	GO:0006939	smooth muscle contraction	8/216	116/17962	8.02e-05	0.00228808	0.00172355	Rock2/Gucy1a1/Ptafr/Edn1/Mrvi1/F2r/Myh11/Acta2	8
GO:0043583	BP	GO:0043583	ear development	12/216	262/17962	8.2e-05	0.00231876	0.00174666	Atg5/Pdgfa/Hes1/Tgfb2/Slc9a3r2/Jag1/Tgfb3/Edn1/Bmper/Itga8/Atp8b1/Bdnf	12
GO:0045683	BP	GO:0045683	negative regulation of epidermis development	4/216	20/17962	8.47e-05	0.0023755	0.0017894	Hes1/Inhba/Msx2/Cdh3	4
GO:0001953	BP	GO:0001953	negative regulation of cell-matrix adhesion	5/216	38/17962	8.72e-05	0.00240566	0.00181213	Serpine1/Phldb2/Jag1/Acvrl1/Thbs1	5
GO:0045601	BP	GO:0045601	regulation of endothelial cell differentiation	5/216	38/17962	8.72e-05	0.00240566	0.00181213	Rock2/Jag1/Tgfb3/Bmp6/Acvrl1	5
GO:0006936	BP	GO:0006936	muscle contraction	13/216	309/17962	9.83e-05	0.00268746	0.0020244	Rock2/Akap6/Cald1/Gucy1a1/Ptafr/Edn1/Kcnd3/Ccn2/Mrvi1/Tpm1/F2r/Myh11/Acta2	13
GO:0071902	BP	GO:0071902	positive regulation of protein serine/threonine kinase activity	13/216	310/17962	0.000101482	0.00275321	0.00207393	Pdgfa/C1qtnf2/Akap6/Arhgef5/Tgfb3/Gadd45g/Edn1/Cspg4/Thbs1/F2r/Itga1/LOC100909849/Fzd8	13
GO:0051797	BP	GO:0051797	regulation of hair follicle development	4/216	21/17962	0.000103662	0.00278967	0.00210139	Tgfb2/Inhba/Msx2/Cdh3	4
GO:0051495	BP	GO:0051495	positive regulation of cytoskeleton organization	11/216	232/17962	0.000119736	0.00319647	0.00240782	Rock2/Arhgef5/Tgfb3/Edn1/Ccn2/Tpm1/LOC108348108/Hspa1a/Hspa1b/Lmod1/Flna	11
GO:0043535	BP	GO:0043535	regulation of blood vessel endothelial cell migration	7/216	92/17962	0.000121656	0.00322195	0.00242702	Prkd1/Meox2/Ets1/Plk2/Acvrl1/Thbs1/Foxc2	7
GO:1901673	BP	GO:1901673	regulation of mitotic spindle assembly	4/216	22/17962	0.000125508	0.0032978	0.00248416	Chmp4c/LOC108348108/Hspa1a/Hspa1b	4
GO:0022612	BP	GO:0022612	gland morphogenesis	9/216	158/17962	0.000127074	0.00331285	0.0024955	Pdgfa/Tgfb2/Pgr/Tgfb3/Lims2/Msx2/Crip1/Lama5/Tnc	9
GO:0071356	BP	GO:0071356	cellular response to tumor necrosis factor	11/216	234/17962	0.000129144	0.00334072	0.00251649	Hes1/Tank/Edn1/Adamts12/Akap12/Actn4/Tnfsf18/Hspa1a/Thbs1/Bdnf/Hspa1b	11
GO:0048839	BP	GO:0048839	inner ear development	11/216	235/17962	0.000134079	0.00342258	0.00257815	Atg5/Pdgfa/Hes1/Tgfb2/Slc9a3r2/Jag1/Tgfb3/Bmper/Itga8/Atp8b1/Bdnf	11
GO:0003205	BP	GO:0003205	cardiac chamber development	10/216	196/17962	0.000134359	0.00342258	0.00257815	Hes1/Tgfb2/Myh10/Jag1/Ccn1/Fhl2/Tpm1/Msx2/Cpe/Foxc2	10
GO:0010594	BP	GO:0010594	regulation of endothelial cell migration	9/216	160/17962	0.000139811	0.0035254	0.0026556	Prkd1/Rock2/Meox2/Ets1/Plk2/Bmper/Acvrl1/Thbs1/Foxc2	9
GO:0030512	BP	GO:0030512	negative regulation of transforming growth factor beta receptor signaling pathway	6/216	66/17962	0.000140509	0.0035254	0.0026556	Rasl11b/Tgfb3/Ldlrad4/Hspa1a/Hspa1b/Cav2	6
GO:0001763	BP	GO:0001763	morphogenesis of a branching structure	11/216	240/17962	0.000161238	0.00401531	0.00302464	Pdgfa/Mgp/Pgr/Edn1/Col4a1/Msx2/Spry1/Cpe/Foxc2/Lama5/Tnc	11
GO:0032233	BP	GO:0032233	positive regulation of actin filament bundle assembly	6/216	68/17962	0.000165924	0.00404152	0.00304438	Rock2/Arhgef5/Tgfb3/Ccn2/Tpm1/Flna	6
GO:0032835	BP	GO:0032835	glomerulus development	6/216	68/17962	0.000165924	0.00404152	0.00304438	Hes1/Nid1/Notch3/Jag1/Foxc2/Acta2	6
GO:1903845	BP	GO:1903845	negative regulation of cellular response to transforming growth factor beta stimulus	6/216	68/17962	0.000165924	0.00404152	0.00304438	Rasl11b/Tgfb3/Ldlrad4/Hspa1a/Hspa1b/Cav2	6
GO:0007265	BP	GO:0007265	Ras protein signal transduction	15/216	420/17962	0.000179075	0.00431948	0.00325376	Tgfb2/Prkd1/Rock2/Arhgef5/Arhgdib/Rab6b/Itgb1/Prag1/Plk2/Cdh13/Kank1/Cadm4/Spry1/Plekhg2/F2r	15
GO:0033627	BP	GO:0033627	cell adhesion mediated by integrin	6/216	69/17962	0.000179924	0.00431948	0.00325376	Serpine1/Itga6/Tgfb2/Itgbl1/Itgb1/Foxc2	6
GO:1902850	BP	GO:1902850	microtubule cytoskeleton organization involved in mitosis	8/216	131/17962	0.00018734	0.00446538	0.00336367	Chmp4c/Plk2/Spry1/Eml1/LOC108348108/Hspa1a/Hspa1b/Flna	8
GO:0042475	BP	GO:0042475	odontogenesis of dentin-containing tooth	7/216	99/17962	0.000192594	0.0045123	0.00339901	Serpine1/Itga6/Tnfrsf11b/Msx2/Lhx8/Lama5/Tnc	7
GO:0048251	BP	GO:0048251	elastic fiber assembly	3/216	10/17962	0.000193365	0.0045123	0.00339901	Eln/Fbln5/Myh11	3
GO:0051764	BP	GO:0051764	actin crosslink formation	3/216	10/17962	0.000193365	0.0045123	0.00339901	Dpysl3/Flna/Actn1	3
GO:0061035	BP	GO:0061035	regulation of cartilage development	6/216	70/17962	0.000194842	0.00451518	0.00340118	Tgfb2/Bmp6/Ccn1/Ccn2/Mustn1/Adamts12	6
GO:0071900	BP	GO:0071900	regulation of protein serine/threonine kinase activity	16/216	472/17962	0.000197806	0.00455226	0.00342911	Pdgfa/C1qtnf2/Dusp1/Akap6/Arhgef5/Tgfb3/Gadd45g/Edn1/Cspg4/Spry1/Dusp8/Thbs1/F2r/Itga1/LOC100909849/Fzd8	16
GO:0110020	BP	GO:0110020	regulation of actomyosin structure organization	7/216	100/17962	0.000205006	0.00468565	0.00352959	Phldb2/Rock2/Arhgef5/Tgfb3/Edn1/Ccn2/Tpm1	7
GO:0034446	BP	GO:0034446	substrate adhesion-dependent cell spreading	7/216	101/17962	0.000218056	0.00495002	0.00372873	Nedd9/Lims2/Kank1/Itga8/Actn4/Lama5/Flna	7
GO:0030324	BP	GO:0030324	lung development	11/216	249/17962	0.000221962	0.00500465	0.00376989	Pdgfa/Hes1/Tgfb2/Mgp/Pgr/Tgfb3/Slc7a11/Ccn2/Spry1/Lama5/Tnc	11
GO:0003012	BP	GO:0003012	muscle system process	15/216	430/17962	0.000230741	0.00516767	0.00389268	Rock2/Akap6/Lmcd1/Cald1/Gucy1a1/Ptafr/Edn1/Kcnd3/Ccn2/Pdlim5/Mrvi1/Tpm1/F2r/Myh11/Acta2	15
GO:0003197	BP	GO:0003197	endocardial cushion development	5/216	47/17962	0.00024418	0.0053876	0.00405835	Tgfb2/Jag1/Msx2/Acvrl1/Thbs1	5
GO:0030239	BP	GO:0030239	myofibril assembly	6/216	73/17962	0.000245521	0.0053876	0.00405835	Myh10/Itgb1/Edn1/Pgm5/Tpm1/Actn1	6
GO:0030323	BP	GO:0030323	respiratory tube development	11/216	252/17962	0.000246085	0.0053876	0.00405835	Pdgfa/Hes1/Tgfb2/Mgp/Pgr/Tgfb3/Slc7a11/Ccn2/Spry1/Lama5/Tnc	11
GO:0043567	BP	GO:0043567	regulation of insulin-like growth factor receptor signaling pathway	4/216	26/17962	0.000247019	0.0053876	0.00405835	Igfbp6/Cdh3/Cilp/Igfbp3	4
GO:0032355	BP	GO:0032355	response to estradiol	11/216	253/17962	0.000254603	0.00551695	0.00415579	Pdgfa/Tgfb2/Dusp1/Ets1/Cryab/Scp2/Ccn2/Msx2/Ntm/Pam/Igfbp3	11
GO:0032231	BP	GO:0032231	regulation of actin filament bundle assembly	7/216	104/17962	0.000261276	0.00555337	0.00418322	Phldb2/Rock2/Arhgef5/Tgfb3/Ccn2/Tpm1/Flna	7
GO:0045778	BP	GO:0045778	positive regulation of ossification	7/216	104/17962	0.000261276	0.00555337	0.00418322	Tgfb2/Prkd1/Jag1/Tgfb3/Bmp6/Ccn1/Msx2	7
GO:0055013	BP	GO:0055013	cardiac muscle cell development	7/216	104/17962	0.000261276	0.00555337	0.00418322	Atg5/Myh10/Akap6/Edn1/Pdlim5/Fhl2/Myh11	7
GO:0061042	BP	GO:0061042	vascular wound healing	3/216	11/17962	0.000263521	0.00556563	0.00419246	Serpine1/Mcam/Foxc2	3
GO:0001558	BP	GO:0001558	regulation of cell growth	15/216	436/17962	0.000267562	0.00561543	0.00422997	Fhl1/Tgfb2/Akap6/Cryab/Inhba/Edn1/Hbegf/Sh3bp4/Acvrl1/LOC108348108/Hspa1a/Bdnf/Fbln5/Hspa1b/Igfbp3	15
GO:0060326	BP	GO:0060326	cell chemotaxis	12/216	300/17962	0.000289118	0.00602114	0.00453558	Cmklr1/Serpine1/Tgfb2/Dusp1/Prkd1/Arhgef5/Edn1/Hbegf/Ackr3/Tnfsf18/Thbs1/Itga1	12
GO:0110053	BP	GO:0110053	regulation of actin filament organization	11/216	257/17962	0.000291211	0.00602114	0.00453558	Eln/Phldb2/Rock2/Arhgef5/Tgfb3/Ccn2/Kank1/Tpm1/Plekhg2/Lmod1/Flna	11
GO:0007052	BP	GO:0007052	mitotic spindle organization	7/216	106/17962	0.000293735	0.00602114	0.00453558	Chmp4c/Plk2/Eml1/LOC108348108/Hspa1a/Hspa1b/Flna	7
GO:0010862	BP	GO:0010862	positive regulation of pathway-restricted SMAD protein phosphorylation	5/216	49/17962	0.000297693	0.00602114	0.00453558	Tgfb2/Tgfb3/Bmp6/Inhba/Acvrl1	5
GO:0071772	BP	GO:0071772	response to BMP	9/216	177/17962	0.000297719	0.00602114	0.00453558	Hes1/Grem2/Bmp6/Ccn1/Kcnd3/Bmper/Msx2/Adamts12/Acvrl1	9
GO:0071773	BP	GO:0071773	cellular response to BMP stimulus	9/216	177/17962	0.000297719	0.00602114	0.00453558	Hes1/Grem2/Bmp6/Ccn1/Kcnd3/Bmper/Msx2/Adamts12/Acvrl1	9
GO:0050673	BP	GO:0050673	epithelial cell proliferation	15/216	441/17962	0.000302019	0.00607131	0.00457338	Hes1/Tgfb2/Prkd1/Pgr/Tgfb3/Bmp6/Cdh13/Efnb2/Bmper/Lims2/Cdh3/Acvrl1/Thbs1/Cav2/Igfbp3	15
GO:1903036	BP	GO:1903036	positive regulation of response to wounding	6/216	76/17962	0.000306036	0.00611522	0.00460645	Serpine1/Kank1/Hbegf/Thbs1/Foxc2/F2r	6
GO:0034612	BP	GO:0034612	response to tumor necrosis factor	11/216	259/17962	0.00031112	0.00617981	0.00465511	Hes1/Tank/Edn1/Adamts12/Akap12/Actn4/Tnfsf18/Hspa1a/Thbs1/Bdnf/Hspa1b	11
GO:0032757	BP	GO:0032757	positive regulation of interleukin-8 production	5/216	50/17962	0.000327567	0.00642995	0.00484353	Serpine1/Afap1l2/Hspa1a/F2r/Hspa1b	5
GO:0071675	BP	GO:0071675	regulation of mononuclear cell migration	5/216	50/17962	0.000327567	0.00642995	0.00484353	Cmklr1/Serpine1/Dusp1/Tnfsf18/Thbs1	5
GO:0045648	BP	GO:0045648	positive regulation of erythrocyte differentiation	4/216	28/17962	0.000332	0.00647886	0.00488038	Ets1/Inhba/Hspa1a/Hspa1b	4
GO:0060363	BP	GO:0060363	cranial suture morphogenesis	3/216	12/17962	0.00034825	0.00675646	0.00508948	Tgfb2/Tgfb3/Msx2	3
GO:0061138	BP	GO:0061138	morphogenesis of a branching epithelium	10/216	221/17962	0.000353689	0.00682231	0.00513909	Pdgfa/Mgp/Pgr/Edn1/Col4a1/Msx2/Spry1/Foxc2/Lama5/Tnc	10
GO:0010761	BP	GO:0010761	fibroblast migration	5/216	51/17962	0.000359656	0.00689754	0.00519575	Schip1/Tns1/Akap12/Thbs1/Acta2	5
GO:0050920	BP	GO:0050920	regulation of chemotaxis	10/216	222/17962	0.000366554	0.00694478	0.00523134	Cmklr1/Serpine1/Dusp1/Prkd1/Edn1/Cdh13/Efnb2/Tubb2b/Tnfsf18/Thbs1	10
GO:0007264	BP	GO:0007264	small GTPase mediated signal transduction	16/216	499/17962	0.000367387	0.00694478	0.00523134	Tgfb2/Prkd1/Rock2/Arhgef5/Arhgdib/Rab6b/Itgb1/Prag1/Plk2/Cdh13/Kank1/Sipa1l2/Cadm4/Spry1/Plekhg2/F2r	16
GO:0016525	BP	GO:0016525	negative regulation of angiogenesis	7/216	110/17962	0.000368362	0.00694478	0.00523134	Serpine1/Tgfb2/Rock2/Meox2/Plk2/Col4a2/Thbs1	7
GO:0001945	BP	GO:0001945	lymph vessel development	4/216	29/17962	0.000381515	0.00707286	0.00532782	Efnb2/Tmem204/Acvrl1/Foxc2	4
GO:0072012	BP	GO:0072012	glomerulus vasculature development	4/216	29/17962	0.000381515	0.00707286	0.00532782	Hes1/Notch3/Foxc2/Acta2	4
GO:0090169	BP	GO:0090169	regulation of spindle assembly	4/216	29/17962	0.000381515	0.00707286	0.00532782	Chmp4c/LOC108348108/Hspa1a/Hspa1b	4
GO:0048754	BP	GO:0048754	branching morphogenesis of an epithelial tube	9/216	184/17962	0.000395882	0.00729725	0.00549685	Mgp/Pgr/Edn1/Col4a1/Msx2/Spry1/Foxc2/Lama5/Tnc	9
GO:0001503	BP	GO:0001503	ossification	14/216	404/17962	0.000397992	0.00729725	0.00549685	Tgfb2/Prkd1/Mgp/Jag1/Tgfb3/Bmp6/Ccn1/Ccn2/Fhl2/Msx2/Acan/Sort1/Foxc2/Igfbp3	14
GO:0045682	BP	GO:0045682	regulation of epidermis development	6/216	80/17962	0.000404251	0.00733145	0.00552261	Hes1/Tgfb2/Rock2/Inhba/Msx2/Cdh3	6
GO:0097755	BP	GO:0097755	positive regulation of blood vessel diameter	6/216	80/17962	0.000404251	0.00733145	0.00552261	Atg5/Gucy1a1/Ptafr/Mrvi1/Hspa1a/Itga1	6
GO:0050921	BP	GO:0050921	positive regulation of chemotaxis	8/216	147/17962	0.000409707	0.00737338	0.0055542	Cmklr1/Serpine1/Prkd1/Edn1/Cdh13/Tubb2b/Tnfsf18/Thbs1	8
GO:0030048	BP	GO:0030048	actin filament-based movement	7/216	112/17962	0.000410983	0.00737338	0.0055542	Myh10/Akap6/Kcnd3/Tpm1/Actn4/Myh9/Acta2	7
GO:0051056	BP	GO:0051056	regulation of small GTPase mediated signal transduction	11/216	268/17962	0.000415509	0.00741473	0.00558534	Tgfb2/Arhgef5/Arhgdib/Itgb1/Prag1/Kank1/Sipa1l2/Cadm4/Spry1/Plekhg2/F2r	11
GO:0042634	BP	GO:0042634	regulation of hair cycle	4/216	30/17962	0.00043609	0.00774059	0.0058308	Tgfb2/Inhba/Msx2/Cdh3	4
GO:0055015	BP	GO:0055015	ventricular cardiac muscle cell development	3/216	13/17962	0.000448718	0.00792261	0.00596792	Atg5/Myh10/Fhl2	3
GO:0097191	BP	GO:0097191	extrinsic apoptotic signaling pathway	10/216	228/17962	0.000452209	0.00794222	0.00598269	Serpine1/Itga6/Tgfb2/Rock2/Inhba/Mllt11/Sort1/Hspa1a/Thbs1/Hspa1b	10
GO:2000181	BP	GO:2000181	negative regulation of blood vessel morphogenesis	7/216	114/17962	0.000457457	0.00799232	0.00602043	Serpine1/Tgfb2/Rock2/Meox2/Plk2/Col4a2/Thbs1	7
GO:0010712	BP	GO:0010712	regulation of collagen metabolic process	5/216	54/17962	0.000470279	0.00817354	0.00615694	Serpine1/Tgfb3/Itgb1/Ccn2/F2r	5
GO:0048333	BP	GO:0048333	mesodermal cell differentiation	4/216	31/17962	0.000496011	0.00848815	0.00639393	Itgb1/Inhba/Itga8/Foxc2	4
GO:0061437	BP	GO:0061437	renal system vasculature development	4/216	31/17962	0.000496011	0.00848815	0.00639393	Hes1/Notch3/Foxc2/Acta2	4
GO:0061440	BP	GO:0061440	kidney vasculature development	4/216	31/17962	0.000496011	0.00848815	0.00639393	Hes1/Notch3/Foxc2/Acta2	4
GO:0030856	BP	GO:0030856	regulation of epithelial cell differentiation	8/216	153/17962	0.000534847	0.00910604	0.00685937	Serpine1/Hes1/Rock2/Jag1/Tgfb3/Bmp6/Msx2/Acvrl1	8
GO:0090307	BP	GO:0090307	mitotic spindle assembly	5/216	56/17962	0.00055709	0.00936978	0.00705803	Chmp4c/LOC108348108/Hspa1a/Hspa1b/Flna	5
GO:1900024	BP	GO:1900024	regulation of substrate adhesion-dependent cell spreading	5/216	56/17962	0.00055709	0.00936978	0.00705803	Nedd9/Lims2/Kank1/Actn4/Flna	5
GO:0032967	BP	GO:0032967	positive regulation of collagen biosynthetic process	4/216	32/17962	0.000561569	0.00936978	0.00705803	Serpine1/Tgfb3/Ccn2/F2r	4
GO:0060561	BP	GO:0060561	apoptotic process involved in morphogenesis	4/216	32/17962	0.000561569	0.00936978	0.00705803	Tgfb2/Cryab/Ccn1/Foxc2	4
GO:0070372	BP	GO:0070372	regulation of ERK1 and ERK2 cascade	12/216	324/17962	0.000576028	0.0095269	0.00717639	Pdgfa/Dusp1/Ccn1/Ccn2/Bmper/Cnksr3/Akap12/Ackr3/Gcnt2/Spry1/F2r/Acta2	12
GO:0050678	BP	GO:0050678	regulation of epithelial cell proliferation	13/216	371/17962	0.000576696	0.0095269	0.00717639	Hes1/Tgfb2/Prkd1/Pgr/Tgfb3/Bmp6/Cdh13/Efnb2/Lims2/Cdh3/Acvrl1/Thbs1/Cav2	13
GO:0007266	BP	GO:0007266	Rho protein signal transduction	9/216	194/17962	0.000581089	0.00955218	0.00719544	Rock2/Arhgef5/Arhgdib/Itgb1/Prag1/Cdh13/Kank1/Plekhg2/F2r	9
GO:0050808	BP	GO:0050808	synapse organization	15/216	470/17962	0.00058718	0.00958812	0.00722251	Gpc4/Myh10/Rock2/Dact1/Slc7a11/Itgb1/Efnb2/Sorbs1/Col4a1/Pdlim5/Bdnf/F2r/Flna/Actn1/Tnc	15
GO:0046578	BP	GO:0046578	regulation of Ras protein signal transduction	10/216	236/17962	0.00059172	0.00958812	0.00722251	Tgfb2/Arhgef5/Arhgdib/Itgb1/Prag1/Kank1/Cadm4/Spry1/Plekhg2/F2r	10
GO:0044706	BP	GO:0044706	multi-multicellular organism process	12/216	325/17962	0.000591895	0.00958812	0.00722251	Serpine1/Tgfb2/Arhgdib/Pgr/Ets1/Tgfb3/Cald1/Itgb1/Ptafr/Edn1/Pam/Igfbp3	12
GO:0043536	BP	GO:0043536	positive regulation of blood vessel endothelial cell migration	5/216	57/17962	0.000604753	0.00970222	0.00730846	Prkd1/Ets1/Plk2/Thbs1/Foxc2	5
GO:0051496	BP	GO:0051496	positive regulation of stress fiber assembly	5/216	57/17962	0.000604753	0.00970222	0.00730846	Rock2/Arhgef5/Tgfb3/Ccn2/Tpm1	5
GO:0010927	BP	GO:0010927	cellular component assembly involved in morphogenesis	7/216	120/17962	0.00062252	0.00993947	0.00748718	Phldb2/Myh10/Itgb1/Edn1/Pgm5/Tpm1/Actn1	7
GO:0060317	BP	GO:0060317	cardiac epithelial to mesenchymal transition	4/216	33/17962	0.000633053	0.00998367	0.00752047	Tgfb2/Jag1/Msx2/Spry1	4
GO:0051492	BP	GO:0051492	regulation of stress fiber assembly	6/216	87/17962	0.000633695	0.00998367	0.00752047	Phldb2/Rock2/Arhgef5/Tgfb3/Ccn2/Tpm1	6
GO:0072073	BP	GO:0072073	kidney epithelium development	8/216	157/17962	0.000634264	0.00998367	0.00752047	Hes1/Jag1/Efnb2/Bmper/Spry1/Foxc2/Bdnf/Lama5	8
GO:0031012	CC	GO:0031012	extracellular matrix	30/220	362/18446	5.62e-17	1.56e-14	1.21e-14	Serpine1/Eln/Itga6/Abi3bp/Ccdc80/Gpc4/Tgfb2/Nid1/Olfml2b/Mgp/Fbln2/Tnfrsf11b/Tgfb3/Itgb1/Pcsk6/Ccn1/Il1rl1/Ccn2/Mfap5/Col4a1/Adamts12/Col4a2/Acan/Cilp/LOC108348074/Col15a1/Thbs1/Fbln5/Lama5/Tnc	30
GO:0062023	CC	GO:0062023	collagen-containing extracellular matrix	24/220	217/18446	1.33e-16	1.84e-14	1.43e-14	Serpine1/Eln/Itga6/Abi3bp/Ccdc80/Gpc4/Tgfb2/Nid1/Mgp/Fbln2/Tgfb3/Itgb1/Pcsk6/Col4a1/Adamts12/Col4a2/Acan/Cilp/LOC108348074/Col15a1/Thbs1/Fbln5/Lama5/Tnc	24
GO:0032432	CC	GO:0032432	actin filament bundle	16/220	94/18446	1.96e-14	1.81e-12	1.41e-12	Myh10/Daam1/Cryab/Vcl/Pgm5/Sorbs1/Pdlim1/Pdlim5/Tpm1/Myl9/Actn4/Myh9/Flna/Actn1/Myh11/Acta2	16
GO:0001725	CC	GO:0001725	stress fiber	14/220	85/18446	1.4e-12	7.76e-11	6.05e-11	Myh10/Daam1/Vcl/Pgm5/Sorbs1/Pdlim1/Pdlim5/Tpm1/Myl9/Actn4/Myh9/Actn1/Myh11/Acta2	14
GO:0097517	CC	GO:0097517	contractile actin filament bundle	14/220	85/18446	1.4e-12	7.76e-11	6.05e-11	Myh10/Daam1/Vcl/Pgm5/Sorbs1/Pdlim1/Pdlim5/Tpm1/Myl9/Actn4/Myh9/Actn1/Myh11/Acta2	14
GO:0042641	CC	GO:0042641	actomyosin	14/220	96/18446	7.86e-12	3.63e-10	2.83e-10	Myh10/Daam1/Vcl/Pgm5/Sorbs1/Pdlim1/Pdlim5/Tpm1/Myl9/Actn4/Myh9/Actn1/Myh11/Acta2	14
GO:0043292	CC	GO:0043292	contractile fiber	18/220	240/18446	6.54e-10	2.59e-08	2.02e-08	Itgb1bp2/Cald1/Cryab/Vcl/Nexn/Pgm5/Pdlim1/Pdlim5/Fhl2/Tpm1/Syne1/Myl9/Actn4/Lmod1/Flna/Actn1/Myh11/Acta2	18
GO:0030016	CC	GO:0030016	myofibril	17/220	230/18446	2.48e-09	8.59e-08	6.69e-08	Itgb1bp2/Cald1/Cryab/Vcl/Nexn/Pgm5/Pdlim1/Pdlim5/Fhl2/Tpm1/Syne1/Myl9/Actn4/Lmod1/Flna/Actn1/Myh11	17
GO:0030055	CC	GO:0030055	cell-substrate junction	15/220	177/18446	3.46e-09	1.02e-07	7.97e-08	Itga6/Phldb2/Itgbl1/Itga7/Aif1l/Vcl/Itgb1/Prag1/Tns1/Pgm5/Sorbs1/Lims2/Itga1/Actn1/Cav2	15
GO:0015629	CC	GO:0015629	actin cytoskeleton	24/220	482/18446	3.69e-09	1.02e-07	7.97e-08	Stk38l/Myh10/Specc1/Daam1/Notch3/Aif1l/Cald1/Cryab/Vcl/Pgm5/Sorbs1/Pdlim1/Pdlim5/Tpm1/Dpysl3/Myl9/Actn4/Klhl2/Myh9/Lmod1/Flna/Actn1/Myh11/Acta2	24
GO:0005604	CC	GO:0005604	basement membrane	12/220	105/18446	4.52e-09	1.14e-07	8.86e-08	Itga6/Ccdc80/Tgfb2/Nid1/Itgb1/Col4a1/Col4a2/Acan/LOC108348074/Col15a1/Lama5/Tnc	12
GO:0030018	CC	GO:0030018	Z disc	12/220	134/18446	7.2e-08	1.66e-06	1.3e-06	Itgb1bp2/Cryab/Vcl/Nexn/Pgm5/Pdlim1/Pdlim5/Fhl2/Myl9/Actn4/Flna/Actn1	12
GO:0005925	CC	GO:0005925	focal adhesion	13/220	165/18446	9.34e-08	1.99e-06	1.55e-06	Phldb2/Itgbl1/Aif1l/Vcl/Itgb1/Prag1/Tns1/Pgm5/Sorbs1/Lims2/Itga1/Actn1/Cav2	13
GO:0030017	CC	GO:0030017	sarcomere	14/220	201/18446	1.39e-07	2.74e-06	2.14e-06	Itgb1bp2/Cryab/Vcl/Nexn/Pgm5/Pdlim1/Pdlim5/Fhl2/Syne1/Myl9/Actn4/Lmod1/Flna/Actn1	14
GO:0031674	CC	GO:0031674	I band	12/220	146/18446	1.86e-07	3.43e-06	2.67e-06	Itgb1bp2/Cryab/Vcl/Nexn/Pgm5/Pdlim1/Pdlim5/Fhl2/Myl9/Actn4/Flna/Actn1	12
GO:0005884	CC	GO:0005884	actin filament	11/220	122/18446	2.38e-07	4.12e-06	3.21e-06	Specc1/Aif1l/Cald1/Vcl/Pdlim1/Pdlim5/Tpm1/Dpysl3/Lmod1/Flna/Actn1	11
GO:0008305	CC	GO:0008305	integrin complex	6/220	33/18446	2.28e-06	3.71e-05	2.89e-05	Itga6/Itgbl1/Itga7/Itgb1/Itga8/Itga1	6
GO:0098636	CC	GO:0098636	protein complex involved in cell adhesion	6/220	36/18446	3.88e-06	5.98e-05	4.66e-05	Itga6/Itgbl1/Itga7/Itgb1/Itga8/Itga1	6
GO:0031252	CC	GO:0031252	cell leading edge	17/220	414/18446	1.03e-05	0.000150623	0.000117338	Phldb2/Myh10/Aif1l/Itgb1/Raph1/Kank1/Itga8/Cspg4/Tpm1/Dpysl3/Cadm4/Actg2/Klhl2/Fat1/Myh9/Actn1/Acta2	17
GO:0005912	CC	GO:0005912	adherens junction	7/220	72/18446	2.38e-05	0.000329827	0.000256943	Jag1/Vcl/Itgb1/Pgm5/Tmem204/Plekha7/Actn1	7
GO:0031941	CC	GO:0031941	filamentous actin	5/220	37/18446	7.36e-05	0.000971472	0.000756799	Specc1/Pdlim1/Pdlim5/Dpysl3/Flna	5
GO:0005581	CC	GO:0005581	collagen trimer	6/220	68/18446	0.00015888	0.00200045	0.00155839	C1qtnf2/C1qtnf7/Col4a1/Col4a2/LOC108348074/Col15a1	6
GO:0005903	CC	GO:0005903	brush border	8/220	134/18446	0.000207396	0.00249776	0.00194582	Myh10/Slc7a11/Vcl/Actn4/Atp8b1/Flna/Actn1/Myh11	8
GO:0042383	CC	GO:0042383	sarcolemma	9/220	171/18446	0.0002174	0.00250916	0.00195469	Akap6/Itga7/Tgfb3/Vcl/Itgb1/Kcnd3/Pgm5/Actn1/Cav2	9
GO:0016460	CC	GO:0016460	myosin II complex	3/220	11/18446	0.000257298	0.00285086	0.00222088	Myh10/Myl9/Myh11	3
GO:0005911	CC	GO:0005911	cell-cell junction	15/220	444/18446	0.000298854	0.00318394	0.00248037	Prkd1/Akap6/Jag1/Vcl/Itgb1/Pgm5/Lims2/Tmem204/Actn4/Cadm4/Plekha7/Fat1/Ncam1/Flna/Actn1	15
GO:0030027	CC	GO:0030027	lamellipodium	9/220	181/18446	0.00033129	0.00339879	0.00264774	Myh10/Itgb1/Cspg4/Dpysl3/Actg2/Klhl2/Fat1/Actn1/Acta2	9
GO:0044291	CC	GO:0044291	cell-cell contact zone	6/220	83/18446	0.000472469	0.00467407	0.00364121	Akap6/Vcl/Itgb1/Pgm5/Cadm4/Actn1	6
GO:0098862	CC	GO:0098862	cluster of actin-based cell projections	9/220	194/18446	0.000549049	0.00504715	0.00393184	Myh10/Slc9a3r2/Slc7a11/Vcl/Actn4/Atp8b1/Flna/Actn1/Myh11	9
GO:0032982	CC	GO:0032982	myosin filament	3/220	14/18446	0.000552793	0.00504715	0.00393184	Myh10/Actg2/Myh11	3
GO:0098685	CC	GO:0098685	Schaffer collateral - CA1 synapse	7/220	119/18446	0.000564843	0.00504715	0.00393184	Rock2/Slc16a7/Itgb1/Efnb2/Tubb2b/Akap12/Ncam1	7
GO:0005938	CC	GO:0005938	cell cortex	12/220	339/18446	0.000799269	0.00691867	0.00538981	Phldb2/Myh10/Prkd1/Crip2/Cald1/Vcl/Ccn2/Actn4/Rai14/Myh9/Flna/Actn1	12
GO:0014704	CC	GO:0014704	intercalated disc	5/220	62/18446	0.000858848	0.00720912	0.00561607	Akap6/Vcl/Itgb1/Pgm5/Actn1	5
GO:0045121	CC	GO:0045121	membrane raft	13/220	396/18446	0.000978063	0.00773886	0.00602875	Akap6/Vcl/Itgb1/Cdh13/Kcnd3/Sorbs1/Cpe/LOC108348108/Hspa1a/F2r/Hspa1b/Itga1/Cav2	13
GO:0098857	CC	GO:0098857	membrane microdomain	13/220	397/18446	0.00100072	0.00773886	0.00602875	Akap6/Vcl/Itgb1/Cdh13/Kcnd3/Sorbs1/Cpe/LOC108348108/Hspa1a/F2r/Hspa1b/Itga1/Cav2	13
GO:0005614	CC	GO:0005614	interstitial matrix	3/220	17/18446	0.00100577	0.00773886	0.00602875	Abi3bp/Ccdc80/Tnc	3
GO:0045178	CC	GO:0045178	basal part of cell	5/220	66/18446	0.00114136	0.00854481	0.00665661	Itga6/Phldb2/Edn1/Slc23a2/Itga1	5
GO:0043204	CC	GO:0043204	perikaryon	8/220	177/18446	0.00131079	0.00955496	0.00744354	Pgr/Mcam/Cryab/Itga8/Pam/Cpe/Bdnf/Itga1	8
GO:0098589	CC	GO:0098589	membrane region	13/220	411/18446	0.00136703	0.00970939	0.00756384	Akap6/Vcl/Itgb1/Cdh13/Kcnd3/Sorbs1/Cpe/LOC108348108/Hspa1a/F2r/Hspa1b/Itga1/Cav2	13
GO:0019838	MF	GO:0019838	growth factor binding	15/201	146/16876	2.2e-10	9.27e-08	8.27e-08	Pdgfa/Itga6/Dusp1/Crim1/Tgfb3/Igfbp6/Pcsk6/Ccn1/Ccn2/Lrrc32/Col4a1/Acvrl1/Sort1/Thbs1/Igfbp3	15
GO:0003779	MF	GO:0003779	actin binding	23/201	407/16876	6.44e-10	1.36e-07	1.21e-07	Myh10/Daam1/Aif1l/Cald1/Vcl/Itgb1/Nexn/Pdlim1/Mical2/Pdlim5/Tagln/Tpm1/Syne1/Actn4/Cnn1/Klhl2/Myh9/Lmod1/Daam2/Flna/Actn1/Myh11/Anxa8	23
GO:0005178	MF	GO:0005178	integrin binding	13/201	129/16876	4.62e-09	6.48e-07	5.79e-07	Itga6/Itgb1bp2/Itgbl1/Itga7/Itgb1/Ccn1/Ccn2/Mfge8/Thbs1/Myh9/Fbln5/Lama5/Actn1	13
GO:0050839	MF	GO:0050839	cell adhesion molecule binding	16/201	232/16876	1.88e-08	1.98e-06	1.76e-06	Itga6/Itgb1bp2/Itgbl1/Itga7/Itgb1/Ccn1/Cdh13/Ccn2/Mfge8/Cdh3/Cpe/Thbs1/Myh9/Fbln5/Lama5/Actn1	16
GO:0050840	MF	GO:0050840	extracellular matrix binding	9/201	61/16876	4.09e-08	3.45e-06	3.08e-06	Eln/Itga6/Nid1/Olfml2b/Fbln2/Itga7/Itgb1/Ccn1/Thbs1	9
GO:0005518	MF	GO:0005518	collagen binding	9/201	72/16876	1.8e-07	1.26e-05	1.12e-05	Pdgfa/Abi3bp/Nid1/Itgb1/Scp2/Cspg4/Tll1/Thbs1/Itga1	9
GO:0005520	MF	GO:0005520	insulin-like growth factor binding	6/201	28/16876	8.02e-07	4.82e-05	4.31e-05	Itga6/Crim1/Igfbp6/Ccn1/Ccn2/Igfbp3	6
GO:0051015	MF	GO:0051015	actin filament binding	13/201	204/16876	1.04e-06	5.45e-05	4.87e-05	Myh10/Aif1l/Vcl/Nexn/Tagln/Tpm1/Syne1/Actn4/Myh9/Flna/Actn1/Myh11/Anxa8	13
GO:0001968	MF	GO:0001968	fibronectin binding	6/201	33/16876	2.24e-06	0.000104987	9.37e-05	Ccdc80/Itgb1/Igfbp6/Ccn2/Thbs1/Igfbp3	6
GO:0005539	MF	GO:0005539	glycosaminoglycan binding	12/201	209/16876	7.95e-06	0.00033488	0.000298918	Abi3bp/Ccdc80/Grem2/Pcsk6/Ccn1/Ccn2/Hbegf/Dpysl3/Susd5/Acan/Ncam1/Thbs1	12
GO:0043236	MF	GO:0043236	laminin binding	5/201	33/16876	4.13e-05	0.00157924	0.00140965	Itga6/Nid1/Itga7/Itgb1/Thbs1	5
GO:1901681	MF	GO:1901681	sulfur compound binding	12/201	250/16876	4.71e-05	0.00165236	0.00147491	Abi3bp/Ccdc80/Grem2/Slc6a6/Scp2/Pcsk6/Ccn1/Ccn2/Hbegf/Dpysl3/Ncam1/Thbs1	12
GO:0008201	MF	GO:0008201	heparin binding	9/201	157/16876	0.000111771	0.00361967	0.00323096	Abi3bp/Ccdc80/Grem2/Pcsk6/Ccn1/Ccn2/Hbegf/Ncam1/Thbs1	9
GO:0050431	MF	GO:0050431	transforming growth factor beta binding	4/201	23/16876	0.000144815	0.00435479	0.00388714	Tgfb3/Lrrc32/Acvrl1/Thbs1	4
GO:0019955	MF	GO:0019955	cytokine binding	8/201	134/16876	0.000203855	0.00572153	0.0051071	Grem2/Tgfb3/Itgb1/Il1rl1/Lrrc32/Ackr3/Acvrl1/Thbs1	8
GO:0008083	MF	GO:0008083	growth factor activity	8/201	143/16876	0.000317412	0.00835189	0.007455	Pdgfa/Tgfb2/Tgfb3/Bmp6/Inhba/Ccn2/Hbegf/Bdnf	8
GO:0031994	MF	GO:0031994	insulin-like growth factor I binding	3/201	12/16876	0.000338294	0.00837775	0.00747807	Itga6/Igfbp6/Igfbp3	3
GO:0005160	MF	GO:0005160	transforming growth factor beta receptor binding	5/201	53/16876	0.000411428	0.00962285	0.00858947	Rasl11b/Tgfb2/Tgfb3/Bmp6/Inhba	5
