# Supplementary material for: A comprehensive analysis of age-related metabolomics and transcriptomics reveals metabolic alterations in rat bone marrow mesenchymal stem cells
Source: Aging (Albany NY). 2022 Jan 30;14(2):1014–32. doi: 10.18632/aging.203857 (PMC8833123; doi:10.18632/aging.203857)
Supplement: Supplementary Table 2 [file aging-14-203857-s003.xlsx]

## Sheet: Supplementary Table 2
Supplementary Table 2. GO enrichment results of down-regulated DEGs.
	ONTOLOGY	ID	Description	GeneRatio	BgRatio	pvalue	p.adjust	qvalue	geneID	Count
GO:0009812	BP	GO:0009812	flavonoid metabolic process	8/276	14/17962	7.79e-12	1.55e-08	1.21e-08	Ugt1a5/Ugt1a3/Ugt1a8/Ugt1a1/Ugt1a2/Ugt1a7c/Ugt1a6/Ugt1a9	8
GO:0052695	BP	GO:0052695	cellular glucuronidation	8/276	14/17962	7.79e-12	1.55e-08	1.21e-08	Ugt1a5/Ugt1a3/Ugt1a8/Ugt1a1/Ugt1a2/Ugt1a7c/Ugt1a6/Ugt1a9	8
GO:0006063	BP	GO:0006063	uronic acid metabolic process	8/276	15/17962	1.65e-11	1.64e-08	1.28e-08	Ugt1a5/Ugt1a3/Ugt1a8/Ugt1a1/Ugt1a2/Ugt1a7c/Ugt1a6/Ugt1a9	8
GO:0019585	BP	GO:0019585	glucuronate metabolic process	8/276	15/17962	1.65e-11	1.64e-08	1.28e-08	Ugt1a5/Ugt1a3/Ugt1a8/Ugt1a1/Ugt1a2/Ugt1a7c/Ugt1a6/Ugt1a9	8
GO:0032496	BP	GO:0032496	response to lipopolysaccharide	30/276	499/17962	1.92e-10	1.53e-07	1.19e-07	Gja1/Ptgs2/Cxcl6/Socs3/Irak3/Dcn/Il1rn/Ptges/Xdh/Casp1/Mgst1/Plscr2/Plscr1/Tspo/Nr1h3/Lcn2/Hp/Wnt5a/Ccl20/Cd14/Abca1/Ugt1a1/Ugt1a6/Sod2/Cxcl16/Adm/Cxcl3/Acp5/Ptgfr/Mgst2	30
GO:0019221	BP	GO:0019221	cytokine-mediated signaling pathway	23/276	369/17962	1.44e-08	8.77e-06	6.86e-06	Foxo3/Sh2b2/Cxcl6/Irak3/Angpt1/Il1rn/Casp1/Ackr4/Lifr/Cxcl12/Il1r1/Ifitm2/Ifitm3/Il4r/Wnt5a/Ccl20/Csf1/Ptprf/Ikbke/Cxcl3/Robo1/Osmr/Il18rap	23
GO:0031100	BP	GO:0031100	animal organ regeneration	15/276	154/17962	1.57e-08	8.77e-06	6.86e-06	Tgfbr3/Cxcl6/Socs3/Lpin1/Angpt1/Sulf2/Aldoc/Lifr/Cxcl12/Hp/Ugt1a3/Ugt1a1/Ugt1a2/Ptch1/Adm	15
GO:0031099	BP	GO:0031099	regeneration	21/276	313/17962	1.76e-08	8.77e-06	6.86e-06	Gja1/Tgfbr3/Cxcl6/Socs3/Lpin1/Angpt1/Sulf2/Tspo/Aldoc/Lifr/Cxcl12/Hp/Mdk/Ugt1a3/Ugt1a1/Ugt1a2/Ptch1/Ptprf/Adm/Vcan/Spp1	21
GO:0051384	BP	GO:0051384	response to glucocorticoid	19/276	297/17962	1.81e-07	8e-05	6.26e-05	Cdo1/Foxo3/S100b/Ptgs2/Socs3/Ahr/Avpr1a/Il1rn/Hp/Wnt5a/Mdk/Ugt1a5/Ugt1a1/Ugt1a6/Pik3r1/Adm/Pappa1/Sfrp4/Errfi1	19
GO:0001889	BP	GO:0001889	liver development	17/276	247/17962	2.92e-07	0.00011597	9.07e-05	Psmb9/Tgfbr3/Hlx/Ahr/Angpt1/Sulf2/Hp/Mdk/Ugt1a5/Ugt1a1/Ugt1a2/Ugt1a7c/Ugt1a6/Sod2/Ptch1/Dbp/Cdkn2a	17
GO:0061008	BP	GO:0061008	hepaticobiliary system development	17/276	250/17962	3.46e-07	0.000125084	9.78e-05	Psmb9/Tgfbr3/Hlx/Ahr/Angpt1/Sulf2/Hp/Mdk/Ugt1a5/Ugt1a1/Ugt1a2/Ugt1a7c/Ugt1a6/Sod2/Ptch1/Dbp/Cdkn2a	17
GO:0031960	BP	GO:0031960	response to corticosteroid	19/276	321/17962	5.96e-07	0.000197631	0.000154573	Cdo1/Foxo3/S100b/Ptgs2/Socs3/Ahr/Avpr1a/Il1rn/Hp/Wnt5a/Mdk/Ugt1a5/Ugt1a1/Ugt1a6/Pik3r1/Adm/Pappa1/Sfrp4/Errfi1	19
GO:0001503	BP	GO:0001503	ossification	21/276	404/17962	1.26e-06	0.000381666	0.000298512	Gja1/Tgfbr3/Ptgs2/Tnn/Osr1/Chrdl1/Ahr/Gpm6b/S1pr1/Lox/Wnt5a/Mdk/Csf1/Clec11a/Ptch1/Pth1r/Mn1/Dchs1/Spp1/Acp5/Cebpd	21
GO:0006805	BP	GO:0006805	xenobiotic metabolic process	11/276	113/17962	1.34e-06	0.000381666	0.000298512	Cdo1/Ahr/Csad/Ugt1a5/Ugt1a3/Ugt1a8/Ugt1a1/Ugt1a2/Ugt1a7c/Ugt1a6/Ugt1a9	11
GO:0010769	BP	GO:0010769	regulation of cell morphogenesis involved in differentiation	19/276	351/17962	2.26e-06	0.000599352	0.00046877	Ntn1/Baiap2/Has2/Sipa1l1/Hecw2/Cxcl12/Fbln1/Pdpn/Obsl1/Cdh2/Wnt5a/Mdk/Net1/Ptprf/Crabp2/Sema3a/Robo1/Efna5/Spp1	19
GO:0072001	BP	GO:0072001	renal system development	19/276	355/17962	2.67e-06	0.000663372	0.000518842	Osr1/Lgr5/Ahr/Dcn/Has2/Angpt1/Sulf2/Six4/Cat/Mme/Irx3/Plce1/Wnt5a/Bcl2l11/Ampd2/Ptch1/Vcan/Dchs1/Enpep	19
GO:0060443	BP	GO:0060443	mammary gland morphogenesis	8/276	62/17962	4.63e-06	0.0010726	0.000838914	Tbx2/Ntn1/Wnt5a/Csf1/Ptch1/Robo1/Sfrp4/Cdkn2a	8
GO:0060560	BP	GO:0060560	developmental growth involved in morphogenesis	16/276	271/17962	4.85e-06	0.0010726	0.000838914	LOC100362819/Alcam/Tnn/Tbx2/Ntn1/Ahr/Six4/Cxcl12/S1pr1/Wnt5a/Csf1/Crabp2/Sema3a/Robo1/Efna5/Spp1	16
GO:0022612	BP	GO:0022612	gland morphogenesis	12/276	158/17962	6.14e-06	0.00127729	0.000999003	Tbx2/Ntn1/Sulf2/Fgf7/Wnt5a/Mdk/Csf1/Ptch1/Sema3a/Robo1/Sfrp4/Cdkn2a	12
GO:0008630	BP	GO:0008630	intrinsic apoptotic signaling pathway in response to DNA damage	10/276	108/17962	6.42e-06	0.00127729	0.000999003	Plscr1/Cxcl12/Clu/Bcl2l11/Pik3r1/Sod2/Ikbke/Mlh1/Bcl3/Steap3	10
GO:0030879	BP	GO:0030879	mammary gland development	13/276	197/17962	1.17e-05	0.00214779	0.00167985	Cdo1/Gja1/Tbx2/Ntn1/Xdh/Wnt5a/Bcl2l11/Csf1/Ptch1/Slc29a1/Robo1/Sfrp4/Cdkn2a	13
GO:0032680	BP	GO:0032680	regulation of tumor necrosis factor production	12/276	169/17962	1.22e-05	0.00214779	0.00167985	Vsir/Irak3/Angpt1/Tspo/Wnt5a/Clu/Cd14/Pik3r1/Tlr3/Bcl3/Acp5/Errfi1	12
GO:0016053	BP	GO:0016053	organic acid biosynthetic process	16/276	292/17962	1.24e-05	0.00214779	0.00167985	Cdo1/Ptgs2/Avpr1a/Has2/Ptges/Csad/Nr1h3/Scd/Slc1a3/Acss2/Fads2/Crabp2/Scd2/Aldh1l1/Glul/Mgst2	16
GO:1903555	BP	GO:1903555	regulation of tumor necrosis factor superfamily cytokine production	12/276	171/17962	1.37e-05	0.00227731	0.00178115	Vsir/Irak3/Angpt1/Tspo/Wnt5a/Clu/Cd14/Pik3r1/Tlr3/Bcl3/Acp5/Errfi1	12
GO:0032640	BP	GO:0032640	tumor necrosis factor production	12/276	172/17962	1.46e-05	0.00231433	0.00181011	Vsir/Irak3/Angpt1/Tspo/Wnt5a/Clu/Cd14/Pik3r1/Tlr3/Bcl3/Acp5/Errfi1	12
GO:0050673	BP	GO:0050673	epithelial cell proliferation	20/276	441/17962	1.71e-05	0.00231433	0.00181011	Gja1/Tgfbr3/Osr1/Lgr5/Has2/Sulf2/Xdh/Six4/Fgf7/Cxcl12/Wnt5a/Serpinb1a/Mdk/Ptch1/Robo1/Ptprk/Glul/Gas1/Errfi1/Cdkn2a	20
GO:0001822	BP	GO:0001822	kidney development	17/276	334/17962	1.73e-05	0.00231433	0.00181011	Osr1/Ahr/Dcn/Has2/Angpt1/Sulf2/Six4/Cat/Mme/Irx3/Plce1/Bcl2l11/Ampd2/Ptch1/Vcan/Dchs1/Enpep	17
GO:0071706	BP	GO:0071706	tumor necrosis factor superfamily cytokine production	12/276	175/17962	1.73e-05	0.00231433	0.00181011	Vsir/Irak3/Angpt1/Tspo/Wnt5a/Clu/Cd14/Pik3r1/Tlr3/Bcl3/Acp5/Errfi1	12
GO:0060326	BP	GO:0060326	cell chemotaxis	16/276	300/17962	1.74e-05	0.00231433	0.00181011	Gja1/Cxcl6/Dock4/Il1rn/Ackr4/Cxcl12/S1pr1/Lox/Wnt5a/Ccl20/Mdk/Csf1/Pla2g7/Cxcl16/Cxcl3/Spp1	16
GO:0001655	BP	GO:0001655	urogenital system development	19/276	405/17962	1.75e-05	0.00231433	0.00181011	Osr1/Lgr5/Ahr/Dcn/Has2/Angpt1/Sulf2/Six4/Cat/Mme/Irx3/Plce1/Wnt5a/Bcl2l11/Ampd2/Ptch1/Vcan/Dchs1/Enpep	19
GO:0050678	BP	GO:0050678	regulation of epithelial cell proliferation	18/276	371/17962	1.87e-05	0.00239386	0.00187231	Gja1/Tgfbr3/Osr1/Has2/Sulf2/Xdh/Six4/Fgf7/Cxcl12/Wnt5a/Mdk/Ptch1/Robo1/Ptprk/Glul/Gas1/Errfi1/Cdkn2a	18
GO:0007411	BP	GO:0007411	axon guidance	14/276	238/17962	1.99e-05	0.00247393	0.00193493	Alcam/Ntn1/Nectin1/Etv1/Cxcl12/Wnt5a/Ptch1/Artn/Sema3a/Robo1/Efna5/Ephb4/Gas1/Emb	14
GO:0097485	BP	GO:0097485	neuron projection guidance	14/276	239/17962	2.09e-05	0.0025137	0.00196604	Alcam/Ntn1/Nectin1/Etv1/Cxcl12/Wnt5a/Ptch1/Artn/Sema3a/Robo1/Efna5/Ephb4/Gas1/Emb	14
GO:0060562	BP	GO:0060562	epithelial tube morphogenesis	18/276	379/17962	2.48e-05	0.00289715	0.00226595	Gja1/Tbx2/Ntn1/Osr1/Lgr5/Ahr/Six4/Irx3/Cxcl12/Wnt5a/Mdk/Csf1/Ptch1/Tead2/Adm/Robo1/Dchs1/Ctsz	18
GO:0003007	BP	GO:0003007	heart morphogenesis	15/276	276/17962	2.56e-05	0.00290549	0.00227247	Gja1/Tgfbr3/Tbx2/Ahr/Has2/Adgrg6/S1pr1/Obsl1/Wnt5a/Tpm1/Ptch1/Tead2/Robo1/Dchs1/Ephb4	15
GO:0070542	BP	GO:0070542	response to fatty acid	10/276	128/17962	2.88e-05	0.00317662	0.00248452	Tgfbr3/Ptgs2/Srebf1/Cat/Scd/Dgat2/Pik3r1/Scd2/Ptgfr/Cdkn2a	10
GO:0001666	BP	GO:0001666	response to hypoxia	19/276	424/17962	3.28e-05	0.00352194	0.00275461	Foxo3/S100b/Tgfbr3/Ptgs2/Kcnk2/Socs3/Angpt4/Angpt1/Casp1/Cox4i2/Cat/Aldoc/Cxcl12/Acaa2/Hp/Sod2/Slc29a1/Adm/Mlh1	19
GO:0045137	BP	GO:0045137	development of primary sexual characteristics	16/276	318/17962	3.53e-05	0.00365298	0.0028571	Foxo3/Gja1/Osr1/Ahr/Kitlg/Angpt1/Six4/Mgst1/Fgf7/Lhfpl2/Ptx3/Wnt5a/Bcl2l11/Tlr3/Sema3a/Inhbb	16
GO:0072006	BP	GO:0072006	nephron development	11/276	159/17962	3.58e-05	0.00365298	0.0028571	Osr1/Ahr/Angpt1/Sulf2/Six4/Irx3/Plce1/Ampd2/Ptch1/Dchs1/Enpep	11
GO:0007409	BP	GO:0007409	axonogenesis	20/276	466/17962	3.74e-05	0.00371709	0.00290724	LOC100362819/Alcam/Tnn/Ntn1/Nectin1/Etv1/Sipa1l1/Cxcl12/Cdh2/Wnt5a/Ptch1/Artn/Crabp2/Sema3a/Robo1/Efna5/Spp1/Ephb4/Gas1/Emb	20
GO:0061138	BP	GO:0061138	morphogenesis of a branching epithelium	13/276	221/17962	3.94e-05	0.00380045	0.00297244	Socs3/Ahr/Six4/Fgf7/Cxcl12/Wnt5a/Mdk/Csf1/Ptch1/Sema3a/Adm/Dchs1/Ctsz	13
GO:0001959	BP	GO:0001959	regulation of cytokine-mediated signaling pathway	9/276	107/17962	4.04e-05	0.00380045	0.00297244	Angpt1/Il1rn/Casp1/Il1r1/Wnt5a/Csf1/Ptprf/Ikbke/Robo1	9
GO:0007157	BP	GO:0007157	heterophilic cell-cell adhesion via plasma membrane cell adhesion molecules	6/276	42/17962	4.11e-05	0.00380045	0.00297244	Alcam/Nectin1/Tenm4/Cdh2/Adgrl1/Dchs1	6
GO:0030198	BP	GO:0030198	extracellular matrix organization	14/276	269/17962	7.58e-05	0.00676322	0.00528971	Lum/Gpm6b/Has2/Sulf2/Ptx3/Fbln1/Lox/Pdpn/Loxl4/Kazald1/Scara3/Mmp23/Col14a1/Bcl3	14
GO:0043062	BP	GO:0043062	extracellular structure organization	14/276	270/17962	7.89e-05	0.00676322	0.00528971	Lum/Gpm6b/Has2/Sulf2/Ptx3/Fbln1/Lox/Pdpn/Loxl4/Kazald1/Scara3/Mmp23/Col14a1/Bcl3	14
GO:0036293	BP	GO:0036293	response to decreased oxygen levels	19/276	453/17962	7.94e-05	0.00676322	0.00528971	Foxo3/S100b/Tgfbr3/Ptgs2/Kcnk2/Socs3/Angpt4/Angpt1/Casp1/Cox4i2/Cat/Aldoc/Cxcl12/Acaa2/Hp/Sod2/Slc29a1/Adm/Mlh1	19
GO:0060759	BP	GO:0060759	regulation of response to cytokine stimulus	9/276	117/17962	8.14e-05	0.00676322	0.00528971	Angpt1/Il1rn/Casp1/Il1r1/Wnt5a/Csf1/Ptprf/Ikbke/Robo1	9
GO:0032835	BP	GO:0032835	glomerulus development	7/276	68/17962	8.16e-05	0.00676322	0.00528971	Osr1/Ahr/Angpt1/Sulf2/Plce1/Ampd2/Enpep	7
GO:0006631	BP	GO:0006631	fatty acid metabolic process	17/276	379/17962	8.43e-05	0.00678416	0.00530609	Ptgs2/Srebf1/Lpin1/Avpr1a/Ptges/Acad11/Nr1h3/Scd/Acaa2/Pdpn/Dgat2/Phyh/Ugt1a8/Ugt1a9/Acss2/Fads2/Scd2	17
GO:0033591	BP	GO:0033591	response to L-ascorbic acid	4/276	16/17962	8.58e-05	0.00678416	0.00530609	Cat/Hp/Sod2/Acp5	4
GO:0098754	BP	GO:0098754	detoxification	9/276	118/17962	8.7e-05	0.00678416	0.00530609	Ptgs2/Mgst1/Nxn/Cat/Hp/Sod2/Mt1/Mt2A/Mgst2	9
GO:0001763	BP	GO:0001763	morphogenesis of a branching structure	13/276	240/17962	9.15e-05	0.00699579	0.00547161	Socs3/Ahr/Six4/Fgf7/Cxcl12/Wnt5a/Mdk/Csf1/Ptch1/Sema3a/Adm/Dchs1/Ctsz	13
GO:0030595	BP	GO:0030595	leukocyte chemotaxis	12/276	208/17962	9.38e-05	0.00703751	0.00550424	Cxcl6/Il1rn/Cxcl12/S1pr1/Wnt5a/Ccl20/Mdk/Csf1/Pla2g7/Cxcl16/Cxcl3/Spp1	12
GO:0007264	BP	GO:0007264	small GTPase mediated signal transduction	20/276	499/17962	9.6e-05	0.00706768	0.00552784	LOC100362819/Sh2b2/Rgl1/Ntn1/Dock4/Kitlg/Sipa1l1/Rab30/Rab27b/Psd3/Plce1/Pdpn/Cdh2/Plekhg4/Arhgap28/Net1/Abca1/Csf1/Robo1/Cdkn2a	20
GO:0031589	BP	GO:0031589	cell-substrate adhesion	16/276	347/17962	9.9e-05	0.00715752	0.0055981	Hpse/Tnn/Gpm6b/Has2/Angpt1/Fbln1/Pdpn/Bcl2l11/Mdk/Net1/Csf1/Pik3r1/Efna5/Spp1/Ptprk/Cdkn2a	16
GO:0008406	BP	GO:0008406	gonad development	15/276	312/17962	0.000102927	0.00730965	0.00571709	Foxo3/Gja1/Osr1/Ahr/Kitlg/Angpt1/Six4/Mgst1/Fgf7/Ptx3/Wnt5a/Bcl2l11/Tlr3/Sema3a/Inhbb	15
GO:0060485	BP	GO:0060485	mesenchyme development	14/276	279/17962	0.000111659	0.00770404	0.00602555	Tgfbr3/Tbx2/Osr1/Has2/Kitlg/Six4/Mad2l2/Pdpn/Wnt5a/Mdk/Tead2/Sema3a/Robo1/Dchs1	14
GO:0071466	BP	GO:0071466	cellular response to xenobiotic stimulus	12/276	212/17962	0.000112355	0.00770404	0.00602555	Cdo1/Ahr/Csad/Ugt1a5/Ugt1a3/Ugt1a8/Ugt1a1/Ugt1a2/Ugt1a7c/Ugt1a6/Ugt1a9/Errfi1	12
GO:0002700	BP	GO:0002700	regulation of production of molecular mediator of immune response	10/276	151/17962	0.000116601	0.00785969	0.00614729	Vsir/Irak3/Angpt1/Mad2l2/Il1r1/Il4r/Wnt5a/Gprc5b/Tlr3/Mlh1	10
GO:0006636	BP	GO:0006636	unsaturated fatty acid biosynthetic process	6/276	51/17962	0.000125666	0.00832958	0.0065148	Ptgs2/Avpr1a/Ptges/Scd/Fads2/Scd2	6
GO:1903522	BP	GO:1903522	regulation of blood circulation	13/276	251/17962	0.000143158	0.00909261	0.00711159	Gja1/Ptgs2/Srebf1/Ahr/Avpr1a/Dock4/Add3/Bin1/Tpm1/Pik3r1/Sema3a/Adm/Kcne4	13
GO:0060537	BP	GO:0060537	muscle tissue development	19/276	474/17962	0.00014326	0.00909261	0.00711159	Gja1/S100b/Tgfbr3/Hlx/Kcnk2/Tbx2/Osr1/Ahr/Dcn/Six4/Klhl41/Tenm4/S1pr1/Lox/Ifitm3/Obsl1/Wnt5a/Tpm1/Col14a1	19
GO:0008286	BP	GO:0008286	insulin receptor signaling pathway	9/276	126/17962	0.000144037	0.00909261	0.00711159	Foxo3/Sh2b2/Socs3/Srebf1/Nr1h3/Ptpre/Pik3r1/Ptprf/Grb14	9
GO:0002027	BP	GO:0002027	regulation of heart rate	8/276	100/17962	0.000154125	0.00947493	0.00741062	Srebf1/Avpr1a/Bin1/Tpm1/Pik3r1/Sema3a/Adm/Kcne4	8
GO:0032355	BP	GO:0032355	response to estradiol	13/276	253/17962	0.000154858	0.00947493	0.00741062	Gja1/Ptgs2/Socs3/Ahr/Cat/Wnt5a/Bcl2l11/Ugt1a1/Pik3r1/Ptch1/Ptgfr/Ramp3/Sfrp4	13
GO:0098742	BP	GO:0098742	cell-cell adhesion via plasma-membrane adhesion molecules	12/276	220/17962	0.000159117	0.00958799	0.00749904	Alcam/Pcdh19/Il1rn/Nectin1/Tenm4/Cdh2/Ptprf/Adgrl1/Robo1/Dchs1/Efna5/Emb	12
GO:0046394	BP	GO:0046394	carboxylic acid biosynthetic process	14/276	290/17962	0.000167303	0.00993081	0.00776717	Ptgs2/Avpr1a/Has2/Ptges/Nr1h3/Scd/Slc1a3/Acss2/Fads2/Crabp2/Scd2/Aldh1l1/Glul/Mgst2	14
GO:0031012	CC	GO:0031012	extracellular matrix	19/279	362/18446	2.84e-06	0.00101429	0.000942069	Tgfbr3/Hpse/Tnn/Ntn1/Dcn/Lum/Podnl1/Plscr1/Ptx3/Fbln1/Lox/Wnt5a/Kazald1/Scara3/Clu/Mmp23/Col14a1/Vcan/Efna5	19
GO:0045121	CC	GO:0045121	membrane raft	19/279	396/18446	1.03e-05	0.00126949	0.00117909	Gja1/Hpse/Ptgs2/Gpm6b/Has2/Angpt1/Plscr1/Mme/Rftn1/Add3/Ldhb/S1pr1/Pdpn/Cdh2/Gprc5b/Cd14/Abca1/Ptch1/Efna5	19
GO:0098857	CC	GO:0098857	membrane microdomain	19/279	397/18446	1.07e-05	0.00126949	0.00117909	Gja1/Hpse/Ptgs2/Gpm6b/Has2/Angpt1/Plscr1/Mme/Rftn1/Add3/Ldhb/S1pr1/Pdpn/Cdh2/Gprc5b/Cd14/Abca1/Ptch1/Efna5	19
GO:0098589	CC	GO:0098589	membrane region	19/279	411/18446	1.73e-05	0.0015452	0.00143517	Gja1/Hpse/Ptgs2/Gpm6b/Has2/Angpt1/Plscr1/Mme/Rftn1/Add3/Ldhb/S1pr1/Pdpn/Cdh2/Gprc5b/Cd14/Abca1/Ptch1/Efna5	19
GO:0015020	MF	GO:0015020	glucuronosyltransferase activity	8/268	29/16876	1.17e-08	6.27e-06	5.72e-06	Ugt1a5/Ugt1a3/Ugt1a8/Ugt1a1/Ugt1a2/Ugt1a7c/Ugt1a6/Ugt1a9	8
