# Supplementary material for: A comprehensive analysis of age-related metabolomics and transcriptomics reveals metabolic alterations in rat bone marrow mesenchymal stem cells
Source: Aging (Albany NY). 2022 Jan 30;14(2):1014–32. doi: 10.18632/aging.203857 (PMC8833123; doi:10.18632/aging.203857)
Supplement: Supplementary Table 3 [file aging-14-203857-s004.xlsx]

## Sheet: Supplementary Table 3
Supplementary Table 3. KEGG enrichment results of up-regulated DEGs.
	ID	Description	GeneRatio	BgRatio	pvalue	p.adjust	qvalue	geneID	Count
rno04510	rno04510	Focal adhesion	19/98	200/8866	3.99e-13	6.78e-11	5.54e-11	25266/114517/25537/299012/81008/305679/24511/290905/364786/296313/63836/306628/445442/25118/140433/293860/81634/363425/116640	19
rno04512	rno04512	ECM-receptor interaction	10/98	87/8866	3.38e-08	2.88e-06	2.35e-06	114517/81008/24511/290905/364786/306628/445442/25118/140433/116640	10
rno04810	rno04810	Regulation of actin cytoskeleton	14/98	223/8866	1.36e-07	7.69e-06	6.28e-06	25266/114517/79433/25537/81008/305679/24511/364786/296313/63836/25439/25118/81634/24582	14
rno04270	rno04270	Vascular smooth muscle contraction	11/98	138/8866	3.08e-07	1.31e-05	1.07e-05	79433/25537/25687/497757/24323/308899/296313/114004/25365/24582/81633	11
rno05410	rno05410	Hypertrophic cardiomyopathy	9/98	91/8866	6.3e-07	2.14e-05	1.75e-05	114517/81809/81008/25717/24511/24323/364786/24851/25118	9
rno05165	rno05165	Human papillomavirus infection	15/98	353/8866	6.69e-06	0.000189657	0.000155014	114517/29577/56761/29146/81008/24511/290905/364786/313658/306628/445442/25118/140433/116640/364754	15
rno05414	rno05414	Dilated cardiomyopathy	8/98	94/8866	8.51e-06	0.000206684	0.000168931	114517/81809/81008/25717/24511/364786/24851/25118	8
rno05146	rno05146	Amoebiasis	8/98	96/8866	9.96e-06	0.000211564	0.00017292	81809/25717/305679/290905/63836/306628/140433/81634	8
rno04151	rno04151	PI3K-Akt signaling pathway	13/98	345/8866	0.000100803	0.00190405	0.00155625	25266/114517/81008/24511/290905/364786/306628/445442/24225/25439/25118/140433/116640	13
rno05145	rno05145	Toxoplasmosis	7/98	111/8866	0.000216114	0.00367393	0.00300284	114517/81809/25717/24511/108348108/24472/140433	7
rno04670	rno04670	Leukocyte transendothelial migration	7/98	117/8866	0.000299039	0.00462151	0.00377733	25537/299012/305679/24511/296313/63836/81634	7
rno05205	rno05205	Proteoglycans in cancer	9/98	207/8866	0.000452006	0.00640342	0.00523376	81809/25537/25615/24511/25433/445442/293860/363425/364754	9
rno05222	rno05222	Small cell lung cancer	6/98	92/8866	0.000518342	0.00677832	0.00554017	114517/24511/291005/290905/306628/140433	6
rno04350	rno04350	TGF-beta signaling pathway	6/98	94/8866	0.000581476	0.00706078	0.00577104	81809/289264/25717/25644/29200/445442	6
rno04060	rno04060	Cytokine-cytokine receptor interaction	10/98	269/8866	0.000745475	0.00844872	0.00690545	81809/25341/25717/25644/29200/171106/25556/84348/364031/25237	10
rno04933	rno04933	AGE-RAGE signaling pathway in diabetic complications	6/98	101/8866	0.000850692	0.0090386	0.00738759	24617/81809/25717/24323/290905/306628	6
rno04010	rno04010	MAPK signaling pathway	10/98	293/8866	0.00142853	0.0142853	0.0116759	25266/81809/114856/25717/291005/361679/108348108/24472/24225/293860	10
rno05412	rno05412	Arrhythmogenic right ventricular cardiomyopathy	5/98	77/8866	0.00156919	0.0148201	0.012113	114517/81008/24511/364786/25118	5
rno04530	rno04530	Tight junction	7/98	167/8866	0.00243895	0.0218222	0.0178361	79433/25537/24511/296313/63836/81634/24582	7
rno05144	rno05144	Malaria	4/98	55/8866	0.00310998	0.0264348	0.0216062	81809/25615/25717/445442	4
rno00601	rno00601	Glycosphingolipid biosynthesis - lacto and neolacto series	3/98	30/8866	0.00428234	0.0346666	0.0283343	305571/246766/306860	3
rno04213	rno04213	Longevity regulating pathway - multiple species	4/98	64/8866	0.00537254	0.0415151	0.0339318	365601/25420/108348108/24472	4
rno05224	rno05224	Breast cancer	6/98	148/8866	0.0058414	0.0431755	0.035289	29577/56761/25154/29146/291005/364754	6
rno04390	rno04390	Hippo signaling pathway	6/98	158/8866	0.00797263	0.0553251	0.0452192	24617/81809/25717/25644/64032/364754	6
rno04520	rno04520	Adherens junction	4/98	72/8866	0.00813604	0.0553251	0.0452192	305679/686098/63836/81634	4
rno04115	rno04115	p53 signaling pathway	4/98	73/8866	0.00853609	0.0558129	0.045618	24617/291005/445442/24484	4
rno04514	rno04514	Cell adhesion molecules	6/98	172/8866	0.0118295	0.0744822	0.0608771	114517/25615/24511/364786/116777/24586	6
rno04218	rno04218	Cellular senescence	6/98	185/8866	0.0164501	0.0998758	0.0816322	24617/81809/24356/25717/291005/24484	6
rno04371	rno04371	Apelin signaling pathway	5/98	138/8866	0.0181992	0.106685	0.0871976	24617/56761/29146/64032/81633	5
rno05418	rno05418	Fluid shear stress and atherosclerosis	5/98	148/8866	0.0238244	0.135005	0.110345	25266/114856/25615/24323/363425	5
rno04974	rno04974	Protein digestion and absorption	4/98	103/8866	0.027024	0.148196	0.121126	25043/290905/306628/298069	4
rno04015	rno04015	Rap1 signaling pathway	6/98	213/8866	0.0303513	0.159558	0.130413	25266/85421/24511/361442/445442/25439	6
rno04330	rno04330	Notch signaling pathway	3/98	62/8866	0.0309731	0.159558	0.130413	29577/56761/29146	3
rno04310	rno04310	Wnt signaling pathway	5/98	164/8866	0.0349676	0.174838	0.142902	317322/314212/25537/316201/364754	5
rno05211	rno05211	Renal cell carcinoma	3/98	70/8866	0.0421097	0.200442	0.163829	81809/24356/25717	3
rno05206	rno05206	MicroRNAs in cancer	7/98	292/8866	0.0425128	0.200442	0.163829	25266/81809/56761/24851/445442/24398/116640	7
rno05140	rno05140	Leishmaniasis	3/98	71/8866	0.0436256	0.200442	0.163829	81809/25717/24511	3
rno05212	rno05212	Pancreatic cancer	3/98	75/8866	0.0499587	0.21739	0.177681	81809/25717/291005	3
rno04611	rno04611	Platelet activation	4/98	126/8866	0.0506272	0.21739	0.177681	25537/24511/497757/25439	4
rno04926	rno04926	Relaxin signaling pathway	4/98	128/8866	0.0530829	0.21739	0.177681	24323/290905/306628/81633	4
rno05100	rno05100	Bacterial invasion of epithelial cells	3/98	77/8866	0.0532846	0.21739	0.177681	305679/24511/363425	3
rno01040	rno01040	Biosynthesis of unsaturated fatty acids	2/98	34/8866	0.0539716	0.21739	0.177681	25541/680115	2
rno05220	rno05220	Chronic myeloid leukemia	3/98	78/8866	0.0549868	0.21739	0.177681	81809/25717/291005	3
rno04068	rno04068	FoxO signaling pathway	4/98	134/8866	0.0608344	0.23491	0.192001	81809/25717/83722/291005	4
rno04915	rno04915	Estrogen signaling pathway	4/98	135/8866	0.062182	0.23491	0.192001	25154/25433/108348108/24472	4
rno04540	rno04540	Gap junction	3/98	87/8866	0.0714485	0.26151	0.213742	25266/497757/291081	3
rno04216	rno04216	Ferroptosis	2/98	41/8866	0.0751012	0.26151	0.213742	365601/310392	2
rno05219	rno05219	Bladder cancer	2/98	41/8866	0.0751012	0.26151	0.213742	25433/445442	2
rno05210	rno05210	Colorectal cancer	3/98	89/8866	0.0753764	0.26151	0.213742	81809/25717/291005	3
rno05020	rno05020	Prion disease	6/98	273/8866	0.0814046	0.275376	0.225075	291081/117550/24586/108348108/24472/363425	6
rno04024	rno04024	cAMP signaling pathway	5/98	212/8866	0.0853523	0.275376	0.225075	25537/24323/296313/24225/25439	5
rno01522	rno01522	Endocrine resistance	3/98	94/8866	0.085604	0.275376	0.225075	56761/29146/25433	3
rno05226	rno05226	Gastric cancer	4/98	151/8866	0.0858526	0.275376	0.225075	81809/25717/291005/364754	4
rno05142	rno05142	Chagas disease	3/98	104/8866	0.107701	0.339057	0.277124	24617/81809/25717	3
rno04022	rno04022	cGMP-PKG signaling pathway	4/98	171/8866	0.120698	0.373067	0.304922	25537/497757/308899/296313	4
rno05134	rno05134	Legionellosis	2/98	58/8866	0.134518	0.38561	0.315174	108348108/24472	2
rno05225	rno05225	Hepatocellular carcinoma	4/98	179/8866	0.136119	0.38561	0.315174	81809/25717/291005/364754	4
rno04360	rno04360	Axon guidance	4/98	181/8866	0.140095	0.38561	0.315174	25537/24511/306636/296313	4
rno00533	rno00533	Glycosaminoglycan biosynthesis - keratan sulfate	1/98	14/8866	0.144205	0.38561	0.315174	305571	1
rno01212	rno01212	Fatty acid metabolism	2/98	61/8866	0.145877	0.38561	0.315174	25541/680115	2
rno04622	rno04622	RIG-I-like receptor signaling pathway	2/98	61/8866	0.145877	0.38561	0.315174	365601/252961	2
rno05321	rno05321	Inflammatory bowel disease	2/98	61/8866	0.145877	0.38561	0.315174	81809/25717	2
rno04722	rno04722	Neurotrophin signaling pathway	3/98	120/8866	0.147035	0.38561	0.315174	362456/83576/24225	3
rno04380	rno04380	Osteoclast differentiation	3/98	121/8866	0.149635	0.38561	0.315174	81809/25341/63839	3
rno05132	rno05132	Salmonella infection	5/98	254/8866	0.149706	0.38561	0.315174	25537/291081/117550/296313/293860	5
rno05217	rno05217	Basal cell carcinoma	2/98	62/8866	0.149707	0.38561	0.315174	291005/364754	2
rno04110	rno04110	Cell cycle	3/98	125/8866	0.160182	0.406432	0.332192	81809/25717/291005	3
rno05202	rno05202	Transcriptional misregulation in cancer	4/98	193/8866	0.164899	0.412248	0.336945	25266/363447/291005/24484	4
rno00120	rno00120	Primary bile acid biosynthesis	1/98	18/8866	0.181485	0.443358	0.362373	25541	1
rno04144	rno04144	Endocytosis	5/98	274/8866	0.185999	0.443358	0.362373	361916/117550/108348108/24472/363425	5
rno04924	rno04924	Renin secretion	2/98	72/8866	0.188984	0.443358	0.362373	497757/24323	2
rno00220	rno00220	Arginine biosynthesis	1/98	19/8866	0.190551	0.443358	0.362373	24398	1
rno05218	rno05218	Melanoma	2/98	73/8866	0.192991	0.443358	0.362373	25266/291005	2
rno05223	rno05223	Non-small cell lung cancer	2/98	73/8866	0.192991	0.443358	0.362373	291005/117550	2
rno05214	rno05214	Glioma	2/98	74/8866	0.197009	0.446554	0.364985	25266/291005	2
rno04964	rno04964	Proximal tubule bicarbonate reclamation	1/98	22/8866	0.217156	0.485744	0.397016	24398	1
rno04072	rno04072	Phospholipase D signaling pathway	3/98	150/8866	0.230433	0.508748	0.415819	25266/306582/25439	3
rno04921	rno04921	Oxytocin signaling pathway	3/98	155/8866	0.245154	0.512509	0.418893	25537/497757/296313	3
rno03320	rno03320	PPAR signaling pathway	2/98	86/8866	0.245857	0.512509	0.418893	25541/686098	2
rno04610	rno04610	Complement and coagulation cascades	2/98	86/8866	0.245857	0.512509	0.418893	24617/25439	2
rno05323	rno05323	Rheumatoid arthritis	2/98	86/8866	0.245857	0.512509	0.418893	81809/25717	2
rno04612	rno04612	Antigen processing and presentation	2/98	87/8866	0.249961	0.512509	0.418893	108348108/24472	2
rno04658	rno04658	Th1 and Th2 cell differentiation	2/98	89/8866	0.258175	0.512509	0.418893	56761/29146	2
rno00512	rno00512	Mucin type O-glycan biosynthesis	1/98	27/8866	0.259588	0.512509	0.418893	288611	1
rno04950	rno04950	Maturity onset diabetes of the young	1/98	27/8866	0.259588	0.512509	0.418893	29577	1
rno04640	rno04640	Hematopoietic cell lineage	2/98	90/8866	0.262284	0.512509	0.418893	114517/25118	2
rno04914	rno04914	Progesterone-mediated oocyte maturation	2/98	90/8866	0.262284	0.512509	0.418893	25154/293056	2
rno00062	rno00062	Fatty acid elongation	1/98	29/8866	0.275916	0.53302	0.435657	680115	1
rno04141	rno04141	Protein processing in endoplasmic reticulum	3/98	168/8866	0.284054	0.542575	0.443467	25420/108348108/24472	3
rno05166	rno05166	Human T-cell leukemia virus 1 infection	4/98	246/8866	0.288852	0.54561	0.445948	81809/24356/25717/25483	4
rno04916	rno04916	Melanogenesis	2/98	99/8866	0.299239	0.553872	0.4527	24323/364754	2
rno04136	rno04136	Autophagy - other	1/98	32/8866	0.299742	0.553872	0.4527	365601	1
rno00250	rno00250	Alanine	aspartate and glutamate metabolism	1/98	36/8866	0.330307	0.603788	0.493498	24398	1
rno04145	rno04145	Phagosome	3/98	185/8866	0.335625	0.606981	0.496109	24511/291081/445442	3
rno04960	rno04960	Aldosterone-regulated sodium reabsorption	1/98	38/8866	0.345091	0.609944	0.49853	116501	1
rno05216	rno05216	Thyroid cancer	1/98	38/8866	0.345091	0.609944	0.49853	291005	1
rno04668	rno04668	TNF signaling pathway	2/98	111/8866	0.348027	0.609944	0.49853	29146/24323	2
rno04066	rno04066	HIF-1 signaling pathway	2/98	113/8866	0.356063	0.61766	0.504837	24617/24323	2
rno04114	rno04114	Oocyte meiosis	2/98	118/8866	0.375998	0.640701	0.523669	25154/293056	2
rno05322	rno05322	Systemic lupus erythematosus	2/98	119/8866	0.379956	0.640701	0.523669	63836/81634	2
rno00514	rno00514	Other types of O-glycan biosynthesis	1/98	43/8866	0.380652	0.640701	0.523669	288611	1
rno04962	rno04962	Vasopressin-regulated water reabsorption	1/98	44/8866	0.387531	0.645885	0.527906	362456	1
rno05030	rno05030	Cocaine addiction	1/98	47/8866	0.407718	0.672933	0.550013	24225	1
rno04979	rno04979	Cholesterol metabolism	1/98	49/8866	0.420809	0.687861	0.562215	83576	1
rno03460	rno03460	Fanconi anemia pathway	1/98	51/8866	0.433614	0.691686	0.565341	29577	1
rno00330	rno00330	Arginine and proline metabolism	1/98	52/8866	0.43991	0.691686	0.565341	24264	1
rno03040	rno03040	Spliceosome	2/98	135/8866	0.44173	0.691686	0.565341	108348108/24472	2
rno05135	rno05135	Yersinia infection	2/98	135/8866	0.44173	0.691686	0.565341	25537/24511	2
rno05203	rno05203	Viral carcinogenesis	3/98	221/8866	0.443493	0.691686	0.565341	313658/63836/81634	3
rno04140	rno04140	Autophagy - animal	2/98	141/8866	0.464038	0.710215	0.580485	365601/252961	2
rno04550	rno04550	Signaling pathways regulating pluripotency of stem cells	2/98	142/8866	0.467706	0.710215	0.580485	29200/364754	2
rno04014	rno04014	Ras signaling pathway	3/98	231/8866	0.472402	0.710215	0.580485	25266/24356/24225	3
rno05162	rno05162	Measles	2/98	144/8866	0.474999	0.710215	0.580485	108348108/24472	2
rno04913	rno04913	Ovarian steroidogenesis	1/98	58/8866	0.476262	0.710215	0.580485	25644	1
rno05213	rno05213	Endometrial cancer	1/98	59/8866	0.482089	0.712653	0.582478	291005	1
rno04020	rno04020	Calcium signaling pathway	3/98	238/8866	0.492243	0.717126	0.586134	25266/58949/25439	3
rno04730	rno04730	Long-term depression	1/98	61/8866	0.493552	0.717126	0.586134	497757	1
rno00561	rno00561	Glycerolipid metabolism	1/98	63/8866	0.504763	0.727201	0.594369	306582	1
rno05161	rno05161	Hepatitis B	2/98	157/8866	0.520909	0.736134	0.60167	81809/25717	2
rno04630	rno04630	JAK-STAT signaling pathway	2/98	158/8866	0.52433	0.736134	0.60167	25177/25266	2
rno04137	rno04137	Mitophagy - animal	1/98	68/8866	0.531728	0.736134	0.60167	365601	1
rno05012	rno05012	Parkinson disease	3/98	253/8866	0.533505	0.736134	0.60167	114856/291081/117550	3
rno04940	rno04940	Type I diabetes mellitus	1/98	69/8866	0.536944	0.736134	0.60167	25669	1
rno05230	rno05230	Central carbon metabolism in cancer	1/98	69/8866	0.536944	0.736134	0.60167	24398	1
rno05133	rno05133	Pertussis	1/98	73/8866	0.55724	0.757846	0.619416	24511	1
rno04621	rno04621	NOD-like receptor signaling pathway	2/98	176/8866	0.583097	0.784406	0.641124	365601/252961	2
rno05152	rno05152	Tuberculosis	2/98	177/8866	0.586203	0.784406	0.641124	81809/25717	2
rno01521	rno01521	EGFR tyrosine kinase inhibitor resistance	1/98	80/8866	0.59066	0.784406	0.641124	25266	1
rno04970	rno04970	Salivary secretion	1/98	81/8866	0.595225	0.784406	0.641124	497757	1
rno04012	rno04012	ErbB signaling pathway	1/98	85/8866	0.61299	0.784698	0.641363	25433	1
rno04061	rno04061	Viral protein interaction with cytokine and cytokine receptor	1/98	85/8866	0.61299	0.784698	0.641363	84348	1
rno05022	rno05022	Pathways of neurodegeneration - multiple diseases	5/98	479/8866	0.616685	0.784698	0.641363	252961/291081/117550/24225/364754	5
rno04146	rno04146	Peroxisome	1/98	87/8866	0.621581	0.784698	0.641363	25541	1
rno04260	rno04260	Cardiac muscle contraction	1/98	88/8866	0.625805	0.784698	0.641363	24851	1
rno04211	rno04211	Longevity regulating pathway	1/98	90/8866	0.634114	0.784698	0.641363	365601	1
rno04912	rno04912	GnRH signaling pathway	1/98	90/8866	0.634114	0.784698	0.641363	25433	1
rno04727	rno04727	GABAergic synapse	1/98	91/8866	0.6382	0.784698	0.641363	24398	1
rno04925	rno04925	Aldosterone synthesis and secretion	1/98	96/8866	0.657961	0.784698	0.641363	85421	1
rno05150	rno05150	Staphylococcus aureus infection	1/98	96/8866	0.657961	0.784698	0.641363	58949	1
rno05016	rno05016	Huntington disease	3/98	307/8866	0.665219	0.784698	0.641363	291081/117550/24225	3
rno00564	rno00564	Glycerophospholipid metabolism	1/98	98/8866	0.665563	0.784698	0.641363	306582	1
rno04064	rno04064	NF-kappa B signaling pathway	1/98	98/8866	0.665563	0.784698	0.641363	291005	1
rno04713	rno04713	Circadian entrainment	1/98	98/8866	0.665563	0.784698	0.641363	497757	1
rno05231	rno05231	Choline metabolism in cancer	1/98	98/8866	0.665563	0.784698	0.641363	25266	1
rno05215	rno05215	Prostate cancer	1/98	99/8866	0.669301	0.784698	0.641363	25266	1
rno05415	rno05415	Diabetic cardiomyopathy	2/98	214/8866	0.689331	0.798973	0.65303	81809/25717	2
rno04928	rno04928	Parathyroid hormone synthesis	secretion and action	1/98	105/8866	0.690876	0.798973	0.65303	25433	1
rno05169	rno05169	Epstein-Barr virus infection	2/98	226/8866	0.717971	0.822222	0.672033	29577/291005	2
rno04724	rno04724	Glutamatergic synapse	1/98	114/8866	0.720653	0.822222	0.672033	24398	1
rno04935	rno04935	Growth hormone synthesis	secretion and action	1/98	116/8866	0.726874	0.823791	0.673315	24484	1
rno04726	rno04726	Serotonergic synapse	1/98	123/8866	0.747588	0.833797	0.681494	114856	1
rno04071	rno04071	Sphingolipid signaling pathway	1/98	124/8866	0.750417	0.833797	0.681494	25537	1
rno04919	rno04919	Thyroid hormone signaling pathway	1/98	124/8866	0.750417	0.833797	0.681494	56761	1
rno04080	rno04080	Neuroactive ligand-receptor interaction	3/98	357/8866	0.7615	0.837629	0.684626	58949/24323/25439	3
rno04142	rno04142	Lysosome	1/98	130/8866	0.766746	0.837629	0.684626	83576	1
rno04728	rno04728	Dopaminergic synapse	1/98	132/8866	0.77195	0.837629	0.684626	117550	1
rno00230	rno00230	Purine metabolism	1/98	134/8866	0.777039	0.837629	0.684626	497757	1
rno04210	rno04210	Apoptosis	1/98	136/8866	0.782016	0.837629	0.684626	291005	1
rno05014	rno05014	Amyotrophic lateral sclerosis	3/98	372/8866	0.78568	0.837629	0.684626	252961/291081/117550	3
rno04910	rno04910	Insulin signaling pathway	1/98	139/8866	0.789276	0.837629	0.684626	686098	1
rno05010	rno05010	Alzheimer disease	3/98	377/8866	0.793284	0.837629	0.684626	291081/117550/364754	3
rno05017	rno05017	Spinocerebellar ataxia	1/98	145/8866	0.803085	0.842743	0.688806	65195	1
rno04261	rno04261	Adrenergic signaling in cardiomyocytes	1/98	148/8866	0.80965	0.84442	0.690176	24851	1
rno04150	rno04150	mTOR signaling pathway	1/98	157/8866	0.828072	0.850007	0.694742	364754	1
rno04217	rno04217	Necroptosis	1/98	158/8866	0.830007	0.850007	0.694742	361916	1
rno04934	rno04934	Cushing syndrome	1/98	158/8866	0.830007	0.850007	0.694742	364754	1
rno05034	rno05034	Alcoholism	1/98	177/8866	0.862929	0.878431	0.717975	24225	1
rno04062	rno04062	Chemokine signaling pathway	1/98	182/8866	0.870488	0.880851	0.719953	25537	1
rno05163	rno05163	Human cytomegalovirus infection	1/98	248/8866	0.938938	0.944494	0.77197	25537	1
rno05171	rno05171	Coronavirus disease - COVID-19	1/98	318/8866	0.972668	0.972668	0.794998	25433	1
