# Supplementary material for: A comprehensive analysis of age-related metabolomics and transcriptomics reveals metabolic alterations in rat bone marrow mesenchymal stem cells
Source: Aging (Albany NY). 2022 Jan 30;14(2):1014–32. doi: 10.18632/aging.203857 (PMC8833123; doi:10.18632/aging.203857)
Supplement: Supplementary Table 4 [file aging-14-203857-s005.xlsx]

## Sheet: Supplementary Table 4
Supplementary Table 4. KEGG enrichment results of down-regulated DEGs.
	ID	Description	GeneRatio	BgRatio	pvalue	p.adjust	qvalue	geneID	Count
rno00053	rno00053	Ascorbate and aldarate metabolism	8/167	30/8866	5.51e-08	1.19e-05	1.05e-05	574523/396551/301595/24861/396527/154516/113992/396552	8
rno00982	rno00982	Drug metabolism - cytochrome P450	11/167	73/8866	9.88e-08	1.19e-05	1.05e-05	246247/171341/574523/396551/301595/24861/396527/154516/113992/396552/295037	11
rno00040	rno00040	Pentose and glucuronate interconversions	8/167	34/8866	1.6e-07	1.28e-05	1.13e-05	574523/396551/301595/24861/396527/154516/113992/396552	8
rno00983	rno00983	Drug metabolism - other enzymes	12/167	96/8866	2.13e-07	1.28e-05	1.13e-05	497811/171341/85269/574523/396551/301595/24861/396527/154516/113992/396552/295037	12
rno00860	rno00860	Porphyrin and chlorophyll metabolism	8/167	42/8866	9.17e-07	4.4e-05	3.9e-05	574523/396551/301595/24861/396527/154516/113992/396552	8
rno00980	rno00980	Metabolism of xenobiotics by cytochrome P450	10/167	76/8866	1.4e-06	5.62e-05	4.98e-05	171341/574523/396551/301595/24861/396527/154516/113992/396552/295037	10
rno05204	rno05204	Chemical carcinogenesis	11/167	97/8866	1.87e-06	6.41e-05	5.68e-05	29527/171341/574523/396551/301595/24861/396527/154516/113992/396552/295037	11
rno00140	rno00140	Steroid hormone biosynthesis	8/167	83/8866	0.000159118	0.00473337	0.0041936	574523/396551/301595/24861/396527/154516/113992/396552	8
rno01240	rno01240	Biosynthesis of cofactors	11/167	157/8866	0.000177501	0.00473337	0.0041936	315085/85269/574523/396551/301595/24861/396527/154516/113992/396552/83578	11
rno00830	rno00830	Retinol metabolism	8/167	86/8866	0.000204063	0.00489752	0.00433903	574523/396551/301595/24861/396527/154516/113992/396552	8
rno04976	rno04976	Bile secretion	8/167	94/8866	0.000376926	0.00822384	0.00728603	574523/396551/301595/24861/396527/154516/113992/396552	8
rno04060	rno04060	Cytokine-cytokine receptor interaction	14/167	269/8866	0.000540403	0.0101785	0.00901782	60665/60582/685243/81680/24772/25663/25084/29538/78965/497942/171551/310132/373540/25196	14
rno04978	rno04978	Mineral absorption	6/167	55/8866	0.000551337	0.0101785	0.00901782	297738/312052/689130/25319/24567/689415	6
rno04216	rno04216	Ferroptosis	5/167	41/8866	0.000966969	0.0161396	0.0142991	306009/619385/689130/25319/170824	5
rno04061	rno04061	Viral protein interaction with cytokine and cytokine receptor	7/167	85/8866	0.00106678	0.0161396	0.0142991	60665/685243/24772/29538/78965/171551/373540	7
rno04668	rno04668	TNF signaling pathway	8/167	111/8866	0.00114132	0.0161396	0.0142991	29527/60665/89829/29538/78965/25513/171551/680611	8
rno05323	rno05323	Rheumatoid arthritis	7/167	86/8866	0.00114322	0.0161396	0.0142991	60665/89807/24772/29538/78965/171551/25732	7
rno04640	rno04640	Hematopoietic cell lineage	7/167	90/8866	0.00149298	0.0199064	0.0176364	60427/24590/25663/81641/25084/60350/78965	7
rno04015	rno04015	Rap1 signaling pathway	10/167	213/8866	0.00692351	0.0831837	0.0736979	366608/296269/60427/89807/246212/29348/114633/78965/25513/116683	10
rno04360	rno04360	Axon guidance	9/167	181/8866	0.00713967	0.0831837	0.0736979	114523/24772/64566/25513/89830/29751/58946/116683/686310	9
rno04657	rno04657	IL-17 signaling pathway	6/167	91/8866	0.00727858	0.0831837	0.0736979	29527/60665/170496/29538/363984/171551	6
rno04151	rno04151	PI3K-Akt signaling pathway	13/167	345/8866	0.0132715	0.14478	0.12827	294515/304913/296269/60427/89807/29348/25084/64547/78965/25513/310132/116683/25353	13
rno04931	rno04931	Insulin resistance	6/167	110/8866	0.0174986	0.182594	0.161772	89829/78968/58852/309513/25513/360406	6
rno01524	rno01524	Platinum drug resistance	5/167	83/8866	0.019946	0.192468	0.17052	171341/25513/81685/25163/295037	5
rno00630	rno00630	Glyoxylate and dicarboxylate metabolism	3/167	31/8866	0.0200488	0.192468	0.17052	24248/311569/24957	3
rno00430	rno00430	Taurine and hypotaurine metabolism	2/167	13/8866	0.0240053	0.219619	0.194575	81718/60356	2
rno01040	rno01040	Biosynthesis of unsaturated fatty acids	3/167	34/8866	0.0256223	0.219619	0.194575	246074/83512/83792	3
rno04614	rno04614	Renin-angiotensin system	3/167	34/8866	0.0256223	0.219619	0.194575	24590/81641/64017	3
rno01212	rno01212	Fatty acid metabolism	4/167	61/8866	0.0276082	0.223079	0.19764	246074/170465/83512/83792	4
rno04932	rno04932	Non-alcoholic fatty liver disease	7/167	156/8866	0.0278848	0.223079	0.19764	89829/78968/84683/58852/64547/25513/100362331	7
rno04014	rno04014	Ras signaling pathway	9/167	231/8866	0.0304249	0.230883	0.204554	289080/296269/60427/89807/29348/114633/78965/25513/116683	9
rno04620	rno04620	Toll-like receptor signaling pathway	5/167	93/8866	0.0307844	0.230883	0.204554	60350/25513/364594/363984/25353	5
rno04213	rno04213	Longevity regulating pathway - multiple species	4/167	64/8866	0.0322016	0.234193	0.207487	294515/24248/25513/24787	4
rno04064	rno04064	NF-kappa B signaling pathway	5/167	98/8866	0.0373631	0.26374	0.233664	29527/24772/25663/60350/171551	5
rno04068	rno04068	FoxO signaling pathway	6/167	134/8866	0.0407733	0.279588	0.247705	294515/24248/29733/64547/25513/24787	6
rno04514	rno04514	Cell adhesion molecules	7/167	172/8866	0.0437641	0.291761	0.25849	690899/79559/192183/116673/83501/360406/114122	7
rno04910	rno04910	Insulin signaling pathway	6/167	139/8866	0.0473092	0.306469	0.271521	114203/89829/78968/309513/25513/360406	6
rno05133	rno05133	Pertussis	4/167	73/8866	0.0485243	0.306469	0.271521	60665/25166/60350/24231	4
rno04062	rno04062	Chemokine signaling pathway	7/167	182/8866	0.0561743	0.345688	0.306267	294515/60665/24772/29538/25513/497942/171551	7
rno04066	rno04066	HIF-1 signaling pathway	5/167	113/8866	0.0619572	0.362676	0.321318	296269/89807/24191/24534/25513	5
rno04625	rno04625	C-type lectin receptor signaling pathway	5/167	113/8866	0.0619572	0.362676	0.321318	29527/25166/25513/363984/680611	5
rno04979	rno04979	Cholesterol metabolism	3/167	49/8866	0.0644382	0.368218	0.326228	24230/306825/313210	3
rno04340	rno04340	Hedgehog signaling pathway	3/167	52/8866	0.0742576	0.41104	0.364167	289338/89830/683470	3
rno04217	rno04217	Necroptosis	6/167	158/8866	0.0778081	0.41104	0.364167	25166/364594/689130/25319/361844/24957	6
rno04380	rno04380	Osteoclast differentiation	5/167	121/8866	0.0780801	0.41104	0.364167	89829/25663/78965/25513/25732	5
rno03320	rno03320	PPAR signaling pathway	4/167	86/8866	0.0787826	0.41104	0.364167	58852/246074/83512/83792	4
rno04146	rno04146	Peroxisome	4/167	87/8866	0.0814265	0.415795	0.36838	497811/24248/114209/24787	4
rno04152	rno04152	AMPK signaling pathway	5/167	124/8866	0.0846571	0.423285	0.375016	294515/78968/246074/25513/83792	5
rno04211	rno04211	Longevity regulating pathway	4/167	90/8866	0.0896183	0.438947	0.388892	294515/24248/25513/24787	4
rno05134	rno05134	Legionellosis	3/167	58/8866	0.0957267	0.447521	0.396488	25166/60350/171551	3
rno05205	rno05205	Proteoglycans in cancer	7/167	207/8866	0.0959773	0.447521	0.396488	64537/29139/81682/114633/64566/25513/89830	7
rno04392	rno04392	Hippo signaling pathway - multiple species	2/167	28/8866	0.0969628	0.447521	0.396488	308582/308912	2
rno05213	rno05213	Endometrial cancer	3/167	59/8866	0.0995276	0.450691	0.399296	294515/25513/81685	3
rno05146	rno05146	Amoebiasis	4/167	96/8866	0.107133	0.473901	0.41986	25663/60350/25513/171551	4
rno00230	rno00230	Purine metabolism	5/167	134/8866	0.108602	0.473901	0.41986	100360582/497811/85269/83585/362015	5
rno00561	rno00561	Glycerolipid metabolism	3/167	63/8866	0.115318	0.494221	0.437863	305166/313977/252900	3
rno00640	rno00640	Propanoate metabolism	2/167	34/8866	0.133961	0.563898	0.499593	24534/311569	2
rno00010	rno00010	Glycolysis / Gluconeogenesis	3/167	68/8866	0.136275	0.563898	0.499593	24191/24534/311569	3
rno00480	rno00480	Glutathione metabolism	3/167	70/8866	0.145001	0.589836	0.522574	171341/81641/295037	3
rno04072	rno04072	Phospholipase D signaling pathway	5/167	150/8866	0.152918	0.594086	0.52634	25107/60427/25513/140694/25652	5
rno00760	rno00760	Nicotinate and nicotinamide metabolism	2/167	37/8866	0.153484	0.594086	0.52634	100360582/315085	2
rno04520	rno04520	Adherens junction	3/167	72/8866	0.153907	0.594086	0.52634	117542/192183/360406	3
rno05218	rno05218	Melanoma	3/167	73/8866	0.158423	0.594086	0.52634	29348/25513/25163	3
rno05223	rno05223	Non-small cell lung cancer	3/167	73/8866	0.158423	0.594086	0.52634	294515/25513/25163	3
rno04917	rno04917	Prolactin signaling pathway	3/167	75/8866	0.167576	0.600074	0.531644	294515/89829/25513	3
rno00750	rno00750	Vitamin B6 metabolism	1/167	10/8866	0.173251	0.600074	0.531644	83578	1
rno00920	rno00920	Sulfur metabolism	1/167	10/8866	0.173251	0.600074	0.531644	103689947	1
rno05100	rno05100	Bacterial invasion of epithelial cells	3/167	77/8866	0.176881	0.600074	0.531644	313702/25513/140694	3
rno05412	rno05412	Arrhythmogenic right ventricular cardiomyopathy	3/167	77/8866	0.176881	0.600074	0.531644	24392/83501/64362	3
rno04630	rno04630	JAK-STAT signaling pathway	5/167	158/8866	0.177522	0.600074	0.531644	89829/81680/25084/25513/310132	5
rno05160	rno05160	Hepatitis C	5/167	158/8866	0.177522	0.600074	0.531644	89829/58852/25513/364594/363984	5
rno04010	rno04010	MAPK signaling pathway	8/167	293/8866	0.187933	0.619775	0.549099	296269/60427/89807/29348/25663/60350/78965/116683	8
rno04722	rno04722	Neurotrophin signaling pathway	4/167	120/8866	0.190161	0.619775	0.549099	294515/114203/314870/25513	4
rno01521	rno01521	EGFR tyrosine kinase inhibitor resistance	3/167	80/8866	0.191097	0.619775	0.549099	294515/64547/25513	3
rno04975	rno04975	Fat digestion and absorption	2/167	44/8866	0.200811	0.642596	0.569318	252900/313210	2
rno05164	rno05164	Influenza A	5/167	169/8866	0.213582	0.669024	0.592732	89829/25166/25513/364594/363984	5
rno00620	rno00620	Pyruvate metabolism	2/167	46/8866	0.214645	0.669024	0.592732	24534/311569	2
rno03050	rno03050	Proteasome	2/167	47/8866	0.221596	0.681834	0.604081	24968/24967	2
rno05210	rno05210	Colorectal cancer	3/167	89/8866	0.235278	0.697923	0.618335	64547/25513/81685	3
rno00270	rno00270	Cysteine and methionine metabolism	2/167	49/8866	0.235549	0.697923	0.618335	81718/24534	2
rno04930	rno04930	Type II diabetes mellitus	2/167	49/8866	0.235549	0.697923	0.618335	89829/25513	2
rno05225	rno05225	Hepatocellular carcinoma	5/167	179/8866	0.248205	0.726454	0.643613	171341/64566/25513/25163/295037	5
rno04070	rno04070	Phosphatidylinositol signaling system	3/167	94/8866	0.260562	0.753432	0.667514	114633/282636/25513	3
rno00910	rno00910	Nitrogen metabolism	1/167	17/8866	0.276432	0.766892	0.67944	24957	1
rno00240	rno00240	Pyrimidine metabolism	2/167	55/8866	0.277609	0.766892	0.67944	100360582/85269	2
rno04623	rno04623	Cytosolic DNA-sensing pathway	2/167	55/8866	0.277609	0.766892	0.67944	25166/363984	2
rno04550	rno04550	Signaling pathways regulating pluripotency of stem cells	4/167	142/8866	0.279027	0.766892	0.67944	81680/64566/25513/25196	4
rno04923	rno04923	Regulation of lipolysis in adipocytes	2/167	56/8866	0.28462	0.766892	0.67944	29527/25513	2
rno00670	rno00670	One carbon pool by folate	1/167	18/8866	0.290088	0.766892	0.67944	64392	1
rno04370	rno04370	VEGF signaling pathway	2/167	58/8866	0.298621	0.766892	0.67944	29527/25513	2
rno00220	rno00220	Arginine biosynthesis	1/167	19/8866	0.303487	0.766892	0.67944	24957	1
rno05418	rno05418	Fluid shear stress and atherosclerosis	4/167	148/8866	0.304432	0.766892	0.67944	171341/25663/25513/295037	4
rno04961	rno04961	Endocrine and other factor-regulated calcium reabsorption	2/167	59/8866	0.305607	0.766892	0.67944	56813/140694	2
rno04659	rno04659	Th17 cell differentiation	3/167	103/8866	0.306825	0.766892	0.67944	25690/25663/25084	3
rno05206	rno05206	MicroRNAs in cancer	7/167	292/8866	0.311824	0.766892	0.67944	29527/304913/64547/24851/25513/116683/25163	7
rno00100	rno00100	Steroid biosynthesis	1/167	20/8866	0.316634	0.766892	0.67944	64191	1
rno00531	rno00531	Glycosaminoglycan degradation	1/167	20/8866	0.316634	0.766892	0.67944	64537	1
rno00532	rno00532	Glycosaminoglycan biosynthesis - chondroitin sulfate / dermatan sulfate	1/167	20/8866	0.316634	0.766892	0.67944	286974	1
rno05226	rno05226	Gastric cancer	4/167	151/8866	0.317235	0.766892	0.67944	29348/64566/25513/81685	4
rno05321	rno05321	Inflammatory bowel disease	2/167	61/8866	0.319538	0.766892	0.67944	25084/373540	2
rno05217	rno05217	Basal cell carcinoma	2/167	62/8866	0.32648	0.775795	0.687327	64566/89830	2
rno04929	rno04929	GnRH secretion	2/167	64/8866	0.340307	0.797346	0.70642	25513/25353	2
rno03430	rno03430	Mismatch repair	1/167	22/8866	0.342194	0.797346	0.70642	81685	1
rno04934	rno04934	Cushing syndrome	4/167	158/8866	0.34726	0.801369	0.709985	170899/25690/64566/25163	4
rno00592	rno00592	alpha-Linolenic acid metabolism	1/167	24/8866	0.366804	0.832493	0.73756	83512	1
rno05221	rno05221	Acute myeloid leukemia	2/167	68/8866	0.367685	0.832493	0.73756	60350/25513	2
rno05230	rno05230	Central carbon metabolism in cancer	2/167	69/8866	0.374463	0.839917	0.744137	24534/25513	2
rno05167	rno05167	Kaposi sarcoma-associated herpesvirus infection	5/167	218/8866	0.392309	0.856276	0.75863	29527/25513/364594/363984/171551	5
rno00562	rno00562	Inositol phosphate metabolism	2/167	73/8866	0.40127	0.856276	0.75863	114633/282636	2
rno04115	rno04115	p53 signaling pathway	2/167	73/8866	0.40127	0.856276	0.75863	170824/25163	2
rno01200	rno01200	Carbon metabolism	3/167	122/8866	0.404693	0.856276	0.75863	24248/24191/311569	3
rno05214	rno05214	Glioma	2/167	74/8866	0.407889	0.856276	0.75863	25513/25163	2
rno05212	rno05212	Pancreatic cancer	2/167	75/8866	0.414473	0.856276	0.75863	25513/25163	2
rno04919	rno04919	Thyroid hormone signaling pathway	3/167	124/8866	0.414828	0.856276	0.75863	259248/114633/25513	3
rno05010	rno05010	Alzheimer disease	8/167	377/8866	0.416746	0.856276	0.75863	29527/84683/24590/64566/78965/25513/300802/100362331	8
rno04621	rno04621	NOD-like receptor signaling pathway	4/167	176/8866	0.42432	0.856276	0.75863	25166/363984/171551/102556096	4
rno00062	rno00062	Fatty acid elongation	1/167	29/8866	0.424396	0.856276	0.75863	170465	1
rno01230	rno01230	Biosynthesis of amino acids	2/167	78/8866	0.434003	0.856276	0.75863	24191/24957	2
rno04721	rno04721	Synaptic vesicle cycle	2/167	78/8866	0.434003	0.856276	0.75863	29483/140694	2
rno05220	rno05220	Chronic myeloid leukemia	2/167	78/8866	0.434003	0.856276	0.75863	25513/25163	2
rno00030	rno00030	Pentose phosphate pathway	1/167	30/8866	0.435274	0.856276	0.75863	24191	1
rno00601	rno00601	Glycosphingolipid biosynthesis - lacto and neolacto series	1/167	30/8866	0.435274	0.856276	0.75863	304023	1
rno00590	rno00590	Arachidonic acid metabolism	2/167	82/8866	0.459493	0.880192	0.779819	29527/59103	2
rno05135	rno05135	Yersinia infection	3/167	135/8866	0.469477	0.880192	0.779819	117542/25166/25513	3
rno04210	rno04210	Apoptosis	3/167	136/8866	0.474337	0.880192	0.779819	64547/25513/252929	3
rno04215	rno04215	Apoptosis - multiple species	1/167	34/8866	0.476778	0.880192	0.779819	64547	1
rno00190	rno00190	Oxidative phosphorylation	3/167	138/8866	0.483997	0.880192	0.779819	84683/361663/100362331	3
rno04270	rno04270	Vascular smooth muscle contraction	3/167	138/8866	0.483997	0.880192	0.779819	25107/25026/56820	3
rno04610	rno04610	Complement and coagulation cascades	2/167	86/8866	0.484311	0.880192	0.779819	24854/24231	2
rno04512	rno04512	ECM-receptor interaction	2/167	87/8866	0.490405	0.880192	0.779819	304913/25353	2
rno05202	rno05202	Transcriptional misregulation in cancer	4/167	193/8866	0.494995	0.880192	0.779819	362733/299138/60350/304005	4
rno00051	rno00051	Fructose and mannose metabolism	1/167	36/8866	0.496379	0.880192	0.779819	24191	1
rno00250	rno00250	Alanine	aspartate and glutamate metabolism	1/167	36/8866	0.496379	0.880192	0.779819	24957	1
rno04260	rno04260	Cardiac muscle contraction	2/167	88/8866	0.496455	0.880192	0.779819	84683/24851	2
rno05165	rno05165	Human papillomavirus infection	7/167	353/8866	0.499781	0.880192	0.779819	29527/304913/64566/25513/364594/363984/25353	7
rno05163	rno05163	Human cytomegalovirus infection	5/167	248/8866	0.503	0.880192	0.779819	29527/24772/25663/25513/25163	5
rno04914	rno04914	Progesterone-mediated oocyte maturation	2/167	90/8866	0.508417	0.880192	0.779819	313702/25513	2
rno05410	rno05410	Hypertrophic cardiomyopathy	2/167	91/8866	0.514329	0.880192	0.779819	24851/64362	2
rno04960	rno04960	Aldosterone-regulated sodium reabsorption	1/167	38/8866	0.51525	0.880192	0.779819	25513	1
rno05216	rno05216	Thyroid cancer	1/167	38/8866	0.51525	0.880192	0.779819	619385	1
rno05222	rno05222	Small cell lung cancer	2/167	92/8866	0.520194	0.880192	0.779819	29527/25513	2
rno05224	rno05224	Breast cancer	3/167	148/8866	0.530973	0.880192	0.779819	29348/64566/25513	3
rno01522	rno01522	Endocrine resistance	2/167	94/8866	0.531783	0.880192	0.779819	25513/25163	2
rno04350	rno04350	TGF-beta signaling pathway	2/167	94/8866	0.531783	0.880192	0.779819	29139/25196	2
rno05414	rno05414	Dilated cardiomyopathy	2/167	94/8866	0.531783	0.880192	0.779819	24851/64362	2
rno04666	rno04666	Fc gamma R-mediated phagocytosis	2/167	95/8866	0.537506	0.883571	0.782813	117028/25513	2
rno05219	rno05219	Bladder cancer	1/167	41/8866	0.542246	0.884078	0.783262	25163	1
rno00564	rno00564	Glycerophospholipid metabolism	2/167	98/8866	0.554386	0.884078	0.783262	305166/313977	2
rno05171	rno05171	Coronavirus disease - COVID-19	6/167	318/8866	0.557091	0.884078	0.783262	25166/25513/364594/363984/100362027/24231	6
rno00514	rno00514	Other types of O-glycan biosynthesis	1/167	43/8866	0.559408	0.884078	0.783262	688618	1
rno04672	rno04672	Intestinal immune network for IgA production	1/167	43/8866	0.559408	0.884078	0.783262	24772	1
rno04916	rno04916	Melanogenesis	2/167	99/8866	0.559916	0.884078	0.783262	60427/64566	2
rno04933	rno04933	AGE-RAGE signaling pathway in diabetic complications	2/167	101/8866	0.57083	0.884374	0.783524	114633/25513	2
rno04150	rno04150	mTOR signaling pathway	3/167	157/8866	0.571158	0.884374	0.783524	313977/64566/25513	3
rno05161	rno05161	Hepatitis B	3/167	157/8866	0.571158	0.884374	0.783524	25513/364594/363984	3
rno04974	rno04974	Protein digestion and absorption	2/167	103/8866	0.581548	0.892675	0.790879	24590/314981	2
rno04973	rno04973	Carbohydrate digestion and absorption	1/167	46/8866	0.583958	0.892675	0.790879	25513	1
rno00565	rno00565	Ether lipid metabolism	1/167	47/8866	0.591836	0.89369	0.791778	301265	1
rno04928	rno04928	Parathyroid hormone synthesis	secretion and action	2/167	105/8866	0.592069	0.89369	0.791778	54264/56813	2
rno04310	rno04310	Wnt signaling pathway	3/167	164/8866	0.600917	0.899118	0.796587	299802/64566/89803	3
rno00071	rno00071	Fatty acid degradation	1/167	49/8866	0.607148	0.899118	0.796587	170465	1
rno04810	rno04810	Regulation of actin cytoskeleton	4/167	223/8866	0.609605	0.899118	0.796587	117542/29348/24772/25513	4
rno00380	rno00380	Tryptophan metabolism	1/167	50/8866	0.614589	0.899118	0.796587	24248	1
rno00520	rno00520	Amino sugar and nucleotide sugar metabolism	1/167	50/8866	0.614589	0.899118	0.796587	498272	1
rno02010	rno02010	ABC transporters	1/167	51/8866	0.62189	0.899118	0.796587	313210	1
rno03460	rno03460	Fanconi anemia pathway	1/167	51/8866	0.62189	0.899118	0.796587	81685	1
rno04724	rno04724	Glutamatergic synapse	2/167	114/8866	0.636981	0.911207	0.807298	29483/24957	2
rno04750	rno04750	Inflammatory mediator regulation of TRP channels	2/167	115/8866	0.641727	0.911207	0.807298	25663/25513	2
rno04935	rno04935	Growth hormone synthesis	secretion and action	2/167	116/8866	0.646423	0.911207	0.807298	89829/25513	2
rno04670	rno04670	Leukocyte transendothelial migration	2/167	117/8866	0.651072	0.911207	0.807298	24772/25513	2
rno00280	rno00280	Valine	leucine and isoleucine degradation	1/167	56/8866	0.656382	0.911207	0.807298	170465	1
rno04613	rno04613	Neutrophil extracellular trap formation	3/167	179/8866	0.660018	0.911207	0.807298	25166/25513/361844	3
rno05322	rno05322	Systemic lupus erythematosus	2/167	119/8866	0.660223	0.911207	0.807298	361844/24231	2
rno04020	rno04020	Calcium signaling pathway	4/167	238/8866	0.660625	0.911207	0.807298	25107/29348/114633/25652	4
rno04913	rno04913	Ovarian steroidogenesis	1/167	58/8866	0.669287	0.911927	0.807936	29527	1
rno04080	rno04080	Neuroactive ligand-receptor interaction	6/167	357/8866	0.669856	0.911927	0.807936	25107/24230/29733/56813/25026/25652	6
rno04218	rno04218	Cellular senescence	3/167	185/8866	0.681833	0.911927	0.807936	294515/25513/25163	3
rno04071	rno04071	Sphingolipid signaling pathway	2/167	124/8866	0.682265	0.911927	0.807936	29733/25513	2
rno05166	rno05166	Human T-cell leukemia virus 1 infection	4/167	246/8866	0.685943	0.911927	0.807936	24230/25663/25513/25163	4
rno04110	rno04110	Cell cycle	2/167	125/8866	0.686531	0.911927	0.807936	313702/25163	2
rno04622	rno04622	RIG-I-like receptor signaling pathway	1/167	61/8866	0.687745	0.911927	0.807936	363984	1
rno04330	rno04330	Notch signaling pathway	1/167	62/8866	0.693668	0.914727	0.810416	300802	1
rno04142	rno04142	Lysosome	2/167	130/8866	0.707167	0.927432	0.821672	25732/252929	2
rno04664	rno04664	Fc epsilon RI signaling pathway	1/167	66/8866	0.716261	0.934254	0.827716	25513	1
rno04137	rno04137	Mitophagy - animal	1/167	68/8866	0.726929	0.937973	0.831011	294515	1
rno04927	rno04927	Cortisol synthesis and secretion	1/167	68/8866	0.726929	0.937973	0.831011	170899	1
rno04510	rno04510	Focal adhesion	3/167	200/8866	0.731806	0.939217	0.832113	304913/25513/25353	3
rno05211	rno05211	Renal cell carcinoma	1/167	70/8866	0.737198	0.941103	0.833785	25513	1
rno05140	rno05140	Leishmaniasis	1/167	71/8866	0.742187	0.941392	0.83404	29527	1
rno04920	rno04920	Adipocytokine signaling pathway	1/167	72/8866	0.747083	0.941392	0.83404	89829	1
rno04120	rno04120	Ubiquitin mediated proteolysis	2/167	143/8866	0.755584	0.941392	0.83404	89829/295704	2
rno05162	rno05162	Measles	2/167	144/8866	0.759008	0.941392	0.83404	25513/363984	2
rno04971	rno04971	Gastric acid secretion	1/167	75/8866	0.761221	0.941392	0.83404	170899	1
rno04144	rno04144	Endocytosis	4/167	274/8866	0.763989	0.941392	0.83404	84357/117028/306380/140694	4
rno04024	rno04024	cAMP signaling pathway	3/167	212/8866	0.767208	0.941392	0.83404	114633/25513/89830	3
rno04662	rno04662	B cell receptor signaling pathway	1/167	77/8866	0.770207	0.941392	0.83404	25513	1
rno05415	rno05415	Diabetic cardiomyopathy	3/167	214/8866	0.772726	0.941392	0.83404	84683/25513/100362331	3
rno04723	rno04723	Retrograde endocannabinoid signaling	2/167	151/8866	0.781841	0.94664	0.83869	29527/100362331	2
rno04390	rno04390	Hippo signaling pathway	2/167	158/8866	0.802766	0.94664	0.83869	64566/308582	2
rno04012	rno04012	ErbB signaling pathway	1/167	85/8866	0.802913	0.94664	0.83869	25513	1
rno05169	rno05169	Epstein-Barr virus infection	3/167	226/8866	0.803636	0.94664	0.83869	64547/25513/363984	3
rno05022	rno05022	Pathways of neurodegeneration - multiple diseases	7/167	479/8866	0.805385	0.94664	0.83869	29527/84683/24248/64566/78965/295704/100362331	7
rno03008	rno03008	Ribosome biogenesis in eukaryotes	1/167	87/8866	0.810339	0.94664	0.83869	309301	1
rno04540	rno04540	Gap junction	1/167	87/8866	0.810339	0.94664	0.83869	24392	1
rno04658	rno04658	Th1 and Th2 cell differentiation	1/167	89/8866	0.817486	0.94664	0.83869	25084	1
rno05235	rno05235	PD-L1 expression and PD-1 checkpoint pathway in cancer	1/167	89/8866	0.817486	0.94664	0.83869	25513	1
rno04727	rno04727	GABAergic synapse	1/167	91/8866	0.824366	0.94664	0.83869	24957	1
rno05016	rno05016	Huntington disease	4/167	307/8866	0.835755	0.94664	0.83869	84683/29483/24787/100362331	4
rno05150	rno05150	Staphylococcus aureus infection	1/167	96/8866	0.840458	0.94664	0.83869	24231	1
rno05231	rno05231	Choline metabolism in cancer	1/167	98/8866	0.846477	0.94664	0.83869	25513	1
rno04650	rno04650	Natural killer cell mediated cytotoxicity	1/167	99/8866	0.849401	0.94664	0.83869	25513	1
rno05215	rno05215	Prostate cancer	1/167	99/8866	0.849401	0.94664	0.83869	25513	1
rno05034	rno05034	Alcoholism	2/167	177/8866	0.850877	0.94664	0.83869	63997/361844	2
rno05168	rno05168	Herpes simplex virus 1 infection	5/167	384/8866	0.855563	0.94664	0.83869	89829/192183/25513/364594/363984	5
rno05012	rno05012	Parkinson disease	3/167	253/8866	0.86051	0.94664	0.83869	84683/295704/100362331	3
rno04660	rno04660	T cell receptor signaling pathway	1/167	104/8866	0.863211	0.94664	0.83869	25513	1
rno04922	rno04922	Glucagon signaling pathway	1/167	104/8866	0.863211	0.94664	0.83869	24534	1
rno05142	rno05142	Chagas disease	1/167	104/8866	0.863211	0.94664	0.83869	25513	1
rno04972	rno04972	Pancreatic secretion	1/167	105/8866	0.865818	0.94664	0.83869	84590	1
rno04145	rno04145	Phagosome	2/167	185/8866	0.867753	0.94664	0.83869	361289/60350	2
rno04725	rno04725	Cholinergic synapse	1/167	113/8866	0.884973	0.961057	0.851463	25513	1
rno05020	rno05020	Prion disease	3/167	273/8866	0.892849	0.963807	0.8539	84683/25513/100362331	3
rno04114	rno04114	Oocyte meiosis	1/167	118/8866	0.895538	0.963807	0.8539	313702	1
rno04726	rno04726	Serotonergic synapse	1/167	123/8866	0.905137	0.965606	0.855493	29527	1
rno04611	rno04611	Platelet activation	1/167	126/8866	0.910471	0.965606	0.855493	25513	1
rno04926	rno04926	Relaxin signaling pathway	1/167	128/8866	0.91386	0.965606	0.855493	25513	1
rno05203	rno05203	Viral carcinogenesis	2/167	221/8866	0.924104	0.965606	0.855493	25513/25163	2
rno04915	rno04915	Estrogen signaling pathway	1/167	135/8866	0.924747	0.965606	0.855493	25513	1
rno05014	rno05014	Amyotrophic lateral sclerosis	4/167	372/8866	0.924895	0.965606	0.855493	25166/84683/24248/100362331	4
rno04371	rno04371	Apelin signaling pathway	1/167	138/8866	0.928984	0.965606	0.855493	25353	1
rno04140	rno04140	Autophagy - animal	1/167	141/8866	0.932983	0.965606	0.855493	25513	1
rno05017	rno05017	Spinocerebellar ataxia	1/167	145/8866	0.937969	0.965606	0.855493	25513	1
rno04714	rno04714	Thermogenesis	2/167	237/8866	0.941105	0.965606	0.855493	84683/100362331	2
rno04261	rno04261	Adrenergic signaling in cardiomyocytes	1/167	148/8866	0.941466	0.965606	0.855493	24851	1
rno04921	rno04921	Oxytocin signaling pathway	1/167	155/8866	0.94888	0.969069	0.858561	29527	1
rno05132	rno05132	Salmonella infection	2/167	254/8866	0.955196	0.971386	0.860614	25166/60350	2
rno04530	rno04530	Tight junction	1/167	167/8866	0.959482	0.971628	0.860828	60324	1
rno05152	rno05152	Tuberculosis	1/167	177/8866	0.966625	0.974748	0.863593	60350	1
rno03010	rno03010	Ribosome	1/167	228/8866	0.987631	0.988999	0.876218	100362027	1
rno05170	rno05170	Human immunodeficiency virus 1 infection	1/167	234/8866	0.988999	0.988999	0.876218	25513	1
